# Supplementary material for: Salivary Exosome Proteomics and Bioinformatics Analysis in 7,12-Dimethylbenz[a]anthracene-Induced Oral Cancer with Radiation Therapy—A Syrian Golden Hamster Model
Source: MDPI journal article supplement (doi:10.3390/diagnostics12010065), 2021-12-28
Supplement: s1 [file s1]

Supplementary Table S1. 174 unique proteins absence in salivary exosomes in PreD group.

| Protein name                                                                                               | Gene name          |
|------------------------------------------------------------------------------------------------------------|--------------------|
| forkhead-associated domain-containing protein 1 OS=Mesocricetus auratus OX=10036 GN=Fhad1 PE=4 SV=1        | Fhad1              |
| V-type proton ATPase catalytic subunit A (Fragments) OS=Mesocricetus auratus OX=10036 GN=ATP6V1A PE=1 SV=1 | ATP6V1A            |
| 40S ribosomal protein S4 OS=Mesocricetus auratus OX=10036 GN=Rps4x PE=3 SV=1                               | Rps4x              |
| Septin OS=Mesocricetus auratus OX=10036 GN=Sept8 PE=3 SV=1                                                 | Sept8              |
| Annexin OS=Mesocricetus auratus OX=10036 GN=Anxa7 PE=3 SV=1                                                | Anxa7              |
| polypyrimidine tract-binding protein 3 OS=Mesocricetus auratus OX=10036 GN=Ptbp3 PE=4 SV=2                 | Ptbp3              |
| bromodomain-containing protein 4 isoform X3 OS=Mesocricetus auratus OX=10036 GN=Brd4 PE=4 SV=1             | Brd4               |
| spectrin alpha chain, non-erythrocytic 1 isoform X2 OS=Mesocricetus auratus OX=10036 GN=Sptan1 PE=3 SV=1   | Sptan1             |
| Eukaryotic translation initiation factor 5A OS=Mesocricetus auratus OX=10036 GN=Eif5a1 PE=3 SV=1           | Eif5a1             |
| Synaptogyrin OS=Mesocricetus auratus OX=10036 GN=Syngr2 PE=3 SV=1                                          | Syngr2             |
| tropomyosin alpha-1 chain isoform X16 OS=Mesocricetus auratus OX=10036 GN=Tpm1 PE=3 SV=1                   | Tpm1               |
| tropomyosin alpha-1 chain isoform X10 OS=Mesocricetus auratus OX=10036 GN=Tpm1 PE=3 SV=1                   | Tpm1               |
| Ubiquitinyl hydrolase 1 OS=Mesocricetus auratus OX=10036 GN=Usp9x PE=3 SV=1                                | Usp9x              |
| tropomyosin beta chain isoform X2 OS=Mesocricetus auratus OX=10036 GN=Tpm2 PE=3 SV=1                       | Tpm2               |
| bromodomain-containing protein 4 isoform X4 OS=Mesocricetus auratus OX=10036 GN=Brd4 PE=4 SV=1             | Brd4               |
| ras-related protein Rab-5A OS=Mesocricetus auratus OX=10036 GN=Rab5a PE=4 SV=1                             | Rab5a              |
| 60S ribosomal protein L13 OS=Mesocricetus auratus OX=10036 GN=Rpl13 PE=3 SV=2                              | Rpl13              |
| H(+)-transporting two-sector ATPase OS=Mesocricetus auratus OX=10036 GN=Atp6v1a PE=3 SV=1                  | Atp6v1a            |
| Actin-related protein 2/3 complex subunit 3 OS=Mesocricetus auratus OX=10036 GN=Arpc3 PE=3 SV=1            | Arpc3              |
| bromodomain-containing protein 4 isoform X1 OS=Mesocricetus auratus OX=10036 GN=Brd4 PE=4 SV=1             | Brd4               |
| CCT-beta OS=Mesocricetus auratus OX=10036 GN=Cct2 PE=3 SV=1                                                | LOC101843624; Cct2 |

|                                                                                                                      |                     |
|----------------------------------------------------------------------------------------------------------------------|---------------------|
| nascent polypeptide-associated complex subunit alpha OS=Mesocricetus auratus OX=10036 GN=LOC101829818 PE=4 SV=1      | Naca; LOC101829818  |
| coatomer subunit alpha-like OS=Mesocricetus auratus OX=10036 GN=LOC110339977 PE=4 SV=1                               | LOC110339977        |
| spectrin alpha chain, non-erythrocytic 1 isoform X4 OS=Mesocricetus auratus OX=10036 GN=Sptan1 PE=3 SV=1             | Sptan1              |
| spectrin alpha chain, non-erythrocytic 1 isoform X5 OS=Mesocricetus auratus OX=10036 GN=Sptan1 PE=3 SV=1             | Sptan1              |
| plakophilin-3 isoform X2 OS=Mesocricetus auratus OX=10036 GN=Pkp3 PE=3 SV=1                                          | Pkp3                |
| Ubiquitin-activating enzyme E1 OS=Mesocricetus auratus OX=10036 GN=Uba1 PE=3 SV=1                                    | Uba1                |
| F-actin-capping protein subunit alpha OS=Mesocricetus auratus OX=10036 GN=Capza1 PE=3 SV=1                           | Capza1              |
| sorcini isoform X2 OS=Mesocricetus auratus OX=10036 GN=Sri PE=4 SV=1                                                 | Sri                 |
| sorcini isoform X1 OS=Mesocricetus auratus OX=10036 GN=Sri PE=4 SV=1                                                 | Sri                 |
| Septin OS=Mesocricetus auratus OX=10036 GN=Sept6 PE=3 SV=1                                                           | Sept6               |
| ubiquitin-conjugating enzyme E2 D2B OS=Mesocricetus auratus OX=10036 GN=LOC101826197 PE=3 SV=1                       | LOC101826197        |
| cellular retinoic acid-binding protein 2 OS=Mesocricetus auratus OX=10036 GN=Crabp2 PE=3 SV=1                        | Crabp2              |
| cAMP-dependent protein kinase type II-alpha regulatory subunit OS=Mesocricetus auratus OX=10036 GN=Prkar2a PE=3 SV=1 | Prkar2a             |
| spectrin alpha chain, non-erythrocytic 1 isoform X1 OS=Mesocricetus auratus OX=10036 GN=Sptan1 PE=3 SV=1             | Sptan1              |
| melanoma inhibitory activity protein 3 OS=Mesocricetus auratus OX=10036 GN=Mia3 PE=4 SV=1                            | Mia3                |
| Thymidine phosphorylase OS=Mesocricetus auratus OX=10036 GN=Tymp PE=3 SV=1                                           | Tymp                |
| complement component C8 gamma chain isoform X1 OS=Mesocricetus auratus OX=10036 GN=C8g PE=4 SV=1                     | C8g                 |
| ras-related protein Rab-5B OS=Mesocricetus auratus OX=10036 GN=Rab5b PE=4 SV=1                                       | Rab5b               |
| transportin-1 OS=Mesocricetus auratus OX=10036 GN=Tnpol PE=4 SV=1                                                    | Tnpol               |
| 40S ribosomal protein S18 OS=Mesocricetus auratus OX=10036 GN=Rps18 PE=3 SV=1                                        | Rps18               |
| tripartite motif-containing protein 29 isoform X2 OS=Mesocricetus auratus OX=10036 GN=Trim29 PE=4 SV=1               | Trim29              |
| kallikrein-15 OS=Mesocricetus auratus OX=10036 GN=Klk15 PE=4 SV=1                                                    | LOC101838896; Klk15 |
| transmembrane emp24 domain-containing protein 9 OS=Mesocricetus auratus OX=10036 GN=Tmed9 PE=3 SV=1                  | Tmed9               |

|                                                                                                          |              |
|----------------------------------------------------------------------------------------------------------|--------------|
| poly(RC)-binding protein 3 isoform X4 OS=Mesocricetus auratus OX=10036 GN=Pcbp3 PE=4 SV=1                | Pcbp3        |
| importin subunit beta-1 OS=Mesocricetus auratus OX=10036 GN=Kpnb1 PE=3 SV=1                              | Kpnb1        |
| Eukaryotic translation initiation factor 3 subunit A OS=Mesocricetus auratus OX=10036 GN=Eif3a PE=3 SV=1 | Eif3a        |
| tropomyosin alpha-1 chain isoform X5 OS=Mesocricetus auratus OX=10036 GN=Tpm1 PE=3 SV=1                  | Tpm1         |
| Septin OS=Mesocricetus auratus OX=10036 GN=Sept6 PE=3 SV=1                                               | Sept6        |
| Ezrin (Fragments) OS=Mesocricetus auratus OX=10036 GN=EZR PE=1 SV=1                                      | EZR          |
| Septin OS=Mesocricetus auratus OX=10036 GN=Sept11 PE=3 SV=1                                              | Sept11       |
| 60S ribosomal protein L4 OS=Mesocricetus auratus OX=10036 GN=Rpl4 PE=3 SV=1                              | Rpl4         |
| Histidine--tRNA ligase, cytoplasmic OS=Mesocricetus auratus OX=10036 GN=HARS1 PE=2 SV=1                  | HARS1        |
| Beta-glucuronidase OS=Mesocricetus auratus OX=10036 GN=Gusb PE=3 SV=1                                    | Gusb         |
| 40S ribosomal protein S4 OS=Mesocricetus auratus OX=10036 GN=LOC101838157 PE=3 SV=1                      | LOC101838157 |
| serpin B7 OS=Mesocricetus auratus OX=10036 GN=Serpib7 PE=3 SV=1                                          | Serpib7      |
| Eukaryotic translation initiation factor 3 subunit I OS=Mesocricetus auratus OX=10036 GN=Eif3i PE=3 SV=1 | Eif3i        |
| tropomyosin alpha-1 chain isoform X4 OS=Mesocricetus auratus OX=10036 GN=Tpm1 PE=3 SV=1                  | Tpm1         |
| Septin OS=Mesocricetus auratus OX=10036 GN=Sept6 PE=3 SV=1                                               | Sept6        |
| 14-3-3 protein theta OS=Mesocricetus auratus OX=10036 GN=Ywhaq PE=3 SV=1                                 | Ywhaq        |
| Septin OS=Mesocricetus auratus OX=10036 GN=Sept8 PE=3 SV=1                                               | Sept8        |
| tropomyosin alpha-1 chain isoform X1 OS=Mesocricetus auratus OX=10036 GN=Tpm1 PE=3 SV=1                  | Tpm1         |
| 40S ribosomal protein S16 OS=Mesocricetus auratus OX=10036 GN=Rps16 PE=3 SV=1                            | Rps16        |
| 26S proteasome non-ATPase regulatory subunit 2 OS=Mesocricetus auratus OX=10036 GN=Psm2 PE=3 SV=1        | Psm2         |
| ras-related protein Rab-2A OS=Mesocricetus auratus OX=10036 GN=Rab2a PE=4 SV=1                           | Rab2a        |
| methylosome protein 50 OS=Mesocricetus auratus OX=10036 GN=Wdr77 PE=4 SV=1                               | Wdr77        |
| plakophilin-3 isoform X1 OS=Mesocricetus auratus OX=10036 GN=Pkp3 PE=3 SV=1                              | Pkp3         |

|                                                                                                          |              |
|----------------------------------------------------------------------------------------------------------|--------------|
| Polyadenylate-binding protein OS=Mesocricetus auratus OX=10036 GN=Pabpc1 PE=3 SV=2                       | Pabpc1       |
| poly(RC)-binding protein 3 isoform X3 OS=Mesocricetus auratus OX=10036 GN=Pcbp3 PE=4 SV=1                | Pcbp3        |
| tropomyosin alpha-1 chain isoform X9 OS=Mesocricetus auratus OX=10036 GN=Tpm1 PE=3 SV=1                  | Tpm1         |
| Vomeroneasal type-1 receptor OS=Mesocricetus auratus OX=10036 GN=LOC101834146 PE=3 SV=1                  | LOC101834146 |
| tropomyosin alpha-1 chain isoform X18 OS=Mesocricetus auratus OX=10036 GN=Tpm1 PE=3 SV=1                 | Tpm1         |
| Phosphoglycerate kinase OS=Mesocricetus auratus OX=10036 GN=LOC110340293 PE=3 SV=1                       | LOC110340293 |
| Histidine ammonia-lyase OS=Mesocricetus auratus OX=10036 GN=Hal PE=3 SV=1                                | Hal          |
| Sulfotransferase OS=Mesocricetus auratus OX=10036 GN=LOC101842832 PE=3 SV=1                              | LOC101842832 |
| tropomyosin alpha-1 chain isoform X7 OS=Mesocricetus auratus OX=10036 GN=Tpm1 PE=3 SV=1                  | Tpm1         |
| tropomyosin alpha-1 chain isoform X13 OS=Mesocricetus auratus OX=10036 GN=Tpm1 PE=3 SV=1                 | Tpm1         |
| Septin OS=Mesocricetus auratus OX=10036 GN=Sept6 PE=3 SV=1                                               | Sept6        |
| 60S ribosomal protein L35a OS=Mesocricetus auratus OX=10036 GN=LOC110340547 PE=3 SV=1                    | LOC110340547 |
| Septin OS=Mesocricetus auratus OX=10036 GN=Sept6 PE=3 SV=1                                               | Sept6        |
| 40S ribosomal protein S3 OS=Mesocricetus auratus OX=10036 GN=Rps3 PE=3 SV=1                              | Rps3         |
| AP-1 complex subunit gamma OS=Mesocricetus auratus OX=10036 GN=Ap1g1 PE=3 SV=1                           | Ap1g1        |
| spectrin alpha chain, non-erythrocytic 1 isoform X6 OS=Mesocricetus auratus OX=10036 GN=Sptan1 PE=3 SV=1 | Sptan1       |
| Heterogeneous nuclear ribonucleoprotein K OS=Mesocricetus auratus OX=10036 GN=Hnrnpk PE=4 SV=1           | Hnrnpk       |
| tropomyosin alpha-1 chain isoform X3 OS=Mesocricetus auratus OX=10036 GN=Tpm1 PE=3 SV=1                  | Tpm1         |
| ubiquitin-conjugating enzyme E2 D2 isoform X1 OS=Mesocricetus auratus OX=10036 GN=Ube2d2 PE=3 SV=1       | Ube2d2       |
| poly(RC)-binding protein 3 isoform X5 OS=Mesocricetus auratus OX=10036 GN=Pcbp3 PE=4 SV=1                | Pcbp3        |
| poly(RC)-binding protein 3 isoform X8 OS=Mesocricetus auratus OX=10036 GN=Pcbp3 PE=4 SV=1                | Pcbp3        |
| Septin OS=Mesocricetus auratus OX=10036 GN=Sept8 PE=3 SV=1                                               | Sept8        |
| tripartite motif-containing protein 29 isoform X1 OS=Mesocricetus auratus OX=10036 GN=Trim29 PE=4 SV=1   | Trim29       |

|                                                                                                                      |              |
|----------------------------------------------------------------------------------------------------------------------|--------------|
| Ribosomal protein OS=Mesocricetus auratus OX=10036 GN=Rpl10a PE=3 SV=1                                               | Rpl10a       |
| tropomyosin alpha-1 chain isoform X19 OS=Mesocricetus auratus OX=10036 GN=Tpm1 PE=3 SV=1                             | Tpm1         |
| tropomyosin alpha-1 chain isoform X8 OS=Mesocricetus auratus OX=10036 GN=Tpm1 PE=3 SV=1                              | Tpm1         |
| Fascin OS=Mesocricetus auratus OX=10036 GN=Fscn1 PE=3 SV=1                                                           | Fscn1        |
| tropomyosin alpha-1 chain isoform X17 OS=Mesocricetus auratus OX=10036 GN=Tpm1 PE=3 SV=1                             | Tpm1         |
| Protein S100 OS=Mesocricetus auratus OX=10036 GN=S100a16 PE=3 SV=1                                                   | S100a16      |
| Small nuclear ribonucleoprotein Sm D3 OS=Mesocricetus auratus OX=10036 GN=Snrpd3 PE=3 SV=1                           | Snrpd3       |
| ADP-ribosylation factor GTPase-activating protein 3 isoform X2 OS=Mesocricetus auratus OX=10036 GN=Arfgap3 PE=4 SV=1 | Arfgap3      |
| 2-deoxy-D-ribose 5-phosphate aldolase OS=Mesocricetus auratus OX=10036 GN=Dera PE=4 SV=1                             | Dera         |
| Ubiquitin thioesterase OS=Mesocricetus auratus OX=10036 GN=Otub1 PE=3 SV=1                                           | Otub1        |
| mitochondrial glutamate carrier 2 OS=Mesocricetus auratus OX=10036 GN=Slc25a18 PE=3 SV=1                             | Slc25a18     |
| F-actin-capping protein subunit beta (Fragments) OS=Mesocricetus auratus OX=10036 GN=CAPZB PE=1 SV=1                 | CAPZB        |
| poly(RC)-binding protein 3 isoform X7 OS=Mesocricetus auratus OX=10036 GN=Pcbp3 PE=4 SV=1                            | Pcbp3        |
| 26S proteasome non-ATPase regulatory subunit 3 OS=Mesocricetus auratus OX=10036 GN=Psm3 PE=3 SV=1                    | Psm3         |
| Transferrin receptor protein 1 OS=Mesocricetus auratus OX=10036 GN=Tfrc PE=3 SV=1                                    | Tfrc         |
| Ribosomal protein L15 OS=Mesocricetus auratus OX=10036 GN=LOC101838491 PE=3 SV=2                                     | LOC101838491 |
| tropomyosin alpha-1 chain isoform X2 OS=Mesocricetus auratus OX=10036 GN=Tpm1 PE=3 SV=1                              | Tpm1         |
| ubiquitin-conjugating enzyme E2 D3 OS=Mesocricetus auratus OX=10036 GN=Ube2d3 PE=3 SV=1                              | Ube2d3       |
| estradiol 17 beta-dehydrogenase 5-like isoform X1 OS=Mesocricetus auratus OX=10036 GN=LOC101843311 PE=3 SV=1         | LOC101843311 |
| 60S ribosomal protein L35a OS=Mesocricetus auratus OX=10036 GN=Rpl35a PE=3 SV=1                                      | Rpl35a       |
| tropomyosin alpha-1 chain isoform X6 OS=Mesocricetus auratus OX=10036 GN=Tpm1 PE=3 SV=1                              | Tpm1         |
| tropomyosin alpha-1 chain isoform X14 OS=Mesocricetus auratus OX=10036 GN=Tpm1 PE=3 SV=1                             | Tpm1         |
| spectrin alpha chain, non-erythrocytic 1 isoform X3 OS=Mesocricetus auratus OX=10036 GN=Sptan1 PE=3 SV=1             | Sptan1       |

|                                                                                                                                                |                               |
|------------------------------------------------------------------------------------------------------------------------------------------------|-------------------------------|
| F-actin-capping protein subunit beta OS=Mesocricetus auratus OX=10036 GN=Capzb PE=3 SV=1                                                       | Capzb                         |
| WD repeat-containing protein 91 OS=Mesocricetus auratus OX=10036 GN=Wdr91 PE=3 SV=1                                                            | Wdr91                         |
| Tropomyosin-1 OS=Mesocricetus auratus OX=10036 GN=Tpm2 PE=2 SV=1                                                                               | Tpm2                          |
| polyadenylate-binding protein 5 OS=Mesocricetus auratus OX=10036 GN=Pabpc5 PE=4 SV=1                                                           | Pabpc5                        |
| tropomyosin alpha-1 chain isoform X15 OS=Mesocricetus auratus OX=10036 GN=Tpm1 PE=3 SV=1                                                       | Tpm1                          |
| poly(RC)-binding protein 3 isoform X6 OS=Mesocricetus auratus OX=10036 GN=Pcbp3 PE=4 SV=1                                                      | Pcbp3                         |
| Glucose-6-phosphate 1-dehydrogenase OS=Mesocricetus auratus OX=10036 GN=G6pd PE=3 SV=1                                                         | G6pd                          |
| Ubiquitinyl hydrolase 1 OS=Mesocricetus auratus OX=10036 GN=Usp9x PE=3 SV=1                                                                    | Usp9x                         |
| 3-hydroxyhexobarbital dehydrogenase 1/3-alpha, 17-beta-hydroxysteroid dehydrogenase OS=Mesocricetus auratus OX=10036 GN=LOC101843311 PE=2 SV=1 | LOC101843311                  |
| Annexin OS=Mesocricetus auratus OX=10036 GN=Anxa7 PE=3 SV=1                                                                                    | Anxa7                         |
| tropomyosin alpha-1 chain isoform X12 OS=Mesocricetus auratus OX=10036 GN=Tpm1 PE=3 SV=1                                                       | Tpm1                          |
| transportin-2 OS=Mesocricetus auratus OX=10036 GN=Tnp2 PE=4 SV=1                                                                               | Tnp2                          |
| Aldehyde dehydrogenase OS=Mesocricetus auratus OX=10036 GN=Aldh3a1 PE=3 SV=1                                                                   | Aldh3a1                       |
| epiplakin OS=Mesocricetus auratus OX=10036 GN=LOC101826226 PE=3 SV=1                                                                           | LOC101826226                  |
| poly(RC)-binding protein 2 OS=Mesocricetus auratus OX=10036 GN=Pcbp2 PE=4 SV=1                                                                 | Pcbp2                         |
| leucine-rich repeat-containing protein 15 OS=Mesocricetus auratus OX=10036 GN=LOC101840888 PE=4 SV=1                                           | LOC101840070;<br>LOC101840888 |
| Delta-aminolevulinic acid dehydratase OS=Mesocricetus auratus OX=10036 GN=Alad PE=3 SV=1                                                       | Alad                          |
| Solute carrier organic anion transporter family member OS=Mesocricetus auratus OX=10036 GN=LOC101831756 PE=3 SV=1                              | LOC101831756                  |
| phosphatidylethanolamine-binding protein 1 OS=Mesocricetus auratus OX=10036 GN=Pebp1 PE=3 SV=1                                                 | Pebp1                         |
| 60S ribosomal protein L11 OS=Mesocricetus auratus OX=10036 GN=Rpl11 PE=3 SV=1                                                                  | Rpl11                         |
| ADP-ribosylation factor GTPase-activating protein 3 isoform X1 OS=Mesocricetus auratus OX=10036 GN=Arfgap3 PE=4 SV=1                           | Arfgap3                       |

|                                                                                                     |              |
|-----------------------------------------------------------------------------------------------------|--------------|
| filamin-A OS=Mesocricetus auratus OX=10036 GN=LOC101842052 PE=3 SV=2                                | LOC101842052 |
| 40S ribosomal protein S11 OS=Mesocricetus auratus OX=10036 GN=Rps11 PE=3 SV=1                       | Rps11        |
| WD repeat-containing protein 91 OS=Mesocricetus auratus OX=10036 GN=Wdr91 PE=3 SV=1                 | Wdr91        |
| D-dopachrome decarboxylase OS=Mesocricetus auratus OX=10036 GN=LOC101844189 PE=3 SV=1               | LOC101844189 |
| 40S ribosomal protein S4 OS=Mesocricetus auratus OX=10036 GN=LOC101839291 PE=3 SV=1                 | LOC101839291 |
| poly(RC)-binding protein 3 isoform X2 OS=Mesocricetus auratus OX=10036 GN=Pcbp3 PE=4 SV=1           | Pcbp3        |
| tropomyosin alpha-1 chain isoform X11 OS=Mesocricetus auratus OX=10036 GN=Tpm1 PE=3 SV=1            | Tpm1         |
| poly(RC)-binding protein 3 isoform X1 OS=Mesocricetus auratus OX=10036 GN=Pcbp3 PE=4 SV=1           | Pcbp3        |
| poly(RC)-binding protein 1 OS=Mesocricetus auratus OX=10036 GN=Pcbp1 PE=4 SV=1                      | Pcbp1        |
| tropomyosin beta chain isoform X1 OS=Mesocricetus auratus OX=10036 GN=Tpm2 PE=3 SV=1                | Tpm2         |
| 2-phospho-D-glycerate hydro-lyase OS=Mesocricetus auratus OX=10036 GN=Eno2 PE=3 SV=1                | Eno2         |
| septin-11 isoform X3 OS=Mesocricetus auratus OX=10036 GN=Sept11 PE=3 SV=1                           | Sept11       |
| F-actin-capping protein subunit beta OS=Mesocricetus auratus OX=10036 GN=Capzb PE=3 SV=1            | Capzb        |
| Ubiquitinyl hydrolase 1 OS=Mesocricetus auratus OX=10036 GN=Usp9x PE=3 SV=1                         | Usp9x        |
| complement component C8 gamma chain isoform X2 OS=Mesocricetus auratus OX=10036 GN=C8g PE=4 SV=1    | C8g          |
| syntaxin-3 isoform X2 OS=Mesocricetus auratus OX=10036 GN=Stx3 PE=3 SV=1                            | Stx3         |
| ras-related protein Rab-5C OS=Mesocricetus auratus OX=10036 GN=Rab5c PE=4 SV=1                      | Rab5c        |
| ubiquitin-conjugating enzyme E2 D2 isoform X2 OS=Mesocricetus auratus OX=10036 GN=Ube2d2 PE=3 SV=1  | Ube2d2       |
| tropomyosin beta chain isoform X3 OS=Mesocricetus auratus OX=10036 GN=Tpm2 PE=3 SV=1                | Tpm2         |
| Acyl-peptide hydrolase OS=Mesocricetus auratus OX=10036 GN=Apeh PE=4 SV=1                           | Apeh         |
| 26S proteasome non-ATPase regulatory subunit 11 OS=Mesocricetus auratus OX=10036 GN=Psm11 PE=3 SV=2 | Psm11        |
| Ubiquitinyl hydrolase 1 OS=Mesocricetus auratus OX=10036 GN=Usp9x PE=3 SV=1                         | Usp9x        |
| 60S ribosomal protein L5 isoform X1 OS=Mesocricetus auratus OX=10036 GN=Rpl5 PE=3 SV=1              | Rpl5         |

|                                                                                                                     |              |
|---------------------------------------------------------------------------------------------------------------------|--------------|
| 14-3-3 protein beta/alpha OS=Mesocricetus auratus OX=10036 GN=Ywhab PE=3 SV=1                                       | Ywhab        |
| Septin OS=Mesocricetus auratus OX=10036 GN=Sept11 PE=3 SV=1                                                         | Sept11       |
| Platelet-activating factor acetylhydrolase IB subunit alpha OS=Mesocricetus auratus OX=10036 GN=Pafah1b1 PE=3 SV=1  | Pafah1b1     |
| Peptidyl-prolyl cis-trans isomerase OS=Mesocricetus auratus OX=10036 GN=LOC101837947 PE=3 SV=1                      | LOC101837947 |
| 60S ribosomal protein L5 isoform X3 OS=Mesocricetus auratus OX=10036 GN=Rpl5 PE=3 SV=1                              | Rpl5         |
| F-actin-capping protein subunit beta OS=Mesocricetus auratus OX=10036 GN=Capzb PE=3 SV=1                            | Capzb        |
| Galectin OS=Mesocricetus auratus OX=10036 GN=Lgalsl PE=4 SV=1                                                       | Lgalsl       |
| cAMP-dependent protein kinase type II-beta regulatory subunit OS=Mesocricetus auratus OX=10036 GN=Prkar2b PE=3 SV=1 | Prkar2b      |
| 60S ribosomal protein L23 OS=Mesocricetus auratus OX=10036 GN=Rpl23 PE=3 SV=1                                       | Rpl23        |
| AP-1 complex subunit gamma OS=Mesocricetus auratus OX=10036 GN=Ap1g1 PE=3 SV=1                                      | Ap1g1        |
| 60S ribosomal protein L11 OS=Mesocricetus auratus OX=10036 GN=LOC101827706 PE=3 SV=1                                | LOC101827706 |
| Solute carrier organic anion transporter family member OS=Mesocricetus auratus OX=10036 GN=LOC101831756 PE=3 SV=1   | LOC101831756 |
| 40S ribosomal protein S2 OS=Mesocricetus auratus OX=10036 GN=Rps2 PE=4 SV=1                                         | Rps2         |
| bromodomain-containing protein 4 isoform X2 OS=Mesocricetus auratus OX=10036 GN=Brd4 PE=4 SV=1                      | Brd4         |
| protein-glutamine gamma-glutamyltransferase 6 OS=Mesocricetus auratus OX=10036 GN=Tgm6 PE=3 SV=1                    | Tgm6         |
| eukaryotic translation initiation factor 4E OS=Mesocricetus auratus OX=10036 GN=LOC101836188 PE=3 SV=1              | LOC101836188 |
| CCT-theta OS=Mesocricetus auratus OX=10036 GN=Cct8 PE=3 SV=1                                                        | Cct8         |

## Supplementary Table 2. 136 reactome pathways in Rattus norvegicus database and 132 reactome pathways in Mus musculus database

| Analysis Type:                                                                                                       | PANTHER Overrepresentation Test (Released 20210224) |                  |                        |                          |                               |                           |                   |
|----------------------------------------------------------------------------------------------------------------------|-----------------------------------------------------|------------------|------------------------|--------------------------|-------------------------------|---------------------------|-------------------|
| Annotation Version and Release Date:                                                                                 | Reactome version 65 Released 2020-11-17             |                  |                        |                          |                               |                           |                   |
| Analyzed List:                                                                                                       | upload_1 (Rattus norvegicus)                        |                  |                        |                          |                               |                           |                   |
| Reference List:                                                                                                      | Rattus norvegicus (all genes in database)           |                  |                        |                          |                               |                           |                   |
| Test Type:                                                                                                           | FISHER                                              |                  |                        |                          |                               |                           |                   |
| Correction:                                                                                                          | FDR                                                 |                  |                        |                          |                               |                           |                   |
| Reactome pathways                                                                                                    | Rattus norvegicus -<br>REFLIST (21586)              | upload_1<br>(86) | upload_1<br>(expected) | upload_1<br>(over/under) | upload_1 (fold<br>Enrichment) | upload_1 (raw<br>P-value) | upload_1<br>(FDR) |
| CREB1 phosphorylation through the activation of Adenylate Cyclase (R-RNO-442720)                                     | 5                                                   | 2                | 0.02                   | +                        | > 100                         | 3.23E-04                  | 1.20E-02          |
| PKA activation in glucagon signalling (R-RNO-164378)                                                                 | 5                                                   | 2                | 0.02                   | +                        | > 100                         | 3.23E-04                  | 1.18E-02          |
| Glucagon signaling in metabolic regulation (R-RNO-163359)                                                            | 7                                                   | 2                | 0.03                   | +                        | 71.71                         | 5.50E-04                  | 1.74E-02          |
| Regulation of localization of FOXO transcription factors (R-RNO-9614399)                                             | 12                                                  | 2                | 0.05                   | +                        | 41.83                         | 1.37E-03                  | 2.93E-02          |
| Activation of BAD and translocation to mitochondria (R-RNO-111447)                                                   | 12                                                  | 2                | 0.05                   | +                        | 41.83                         | 1.37E-03                  | 2.89E-02          |
| Chk1/Chk2(Cds1) mediated inactivation of Cyclin B:Cdk1 complex (R-RNO-75035)                                         | 12                                                  | 2                | 0.05                   | +                        | 41.83                         | 1.37E-03                  | 2.85E-02          |
| Formation of the ternary complex, and subsequently, the 43S complex (R-RNO-72695)                                    | 51                                                  | 8                | 0.2                    | +                        | 39.37                         | 8.29E-11                  | 7.16E-09          |
| Translation initiation complex formation (R-RNO-72649)                                                               | 58                                                  | 9                | 0.23                   | +                        | 38.95                         | 5.63E-12                  | 5.78E-10          |
| Activation of the mRNA upon binding of the cap-binding complex and eIFs, and subsequent binding to 43S (R-RNO-72662) | 59                                                  | 9                | 0.24                   | +                        | 38.29                         | 6.46E-12                  | 6.24E-10          |
| Pentose phosphate pathway (R-RNO-71336)                                                                              | 14                                                  | 2                | 0.06                   | +                        | 35.86                         | 1.80E-03                  | 3.36E-02          |
| Ribosomal scanning and start codon recognition (R-RNO-72702)                                                         | 58                                                  | 8                | 0.23                   | +                        | 34.62                         | 2.10E-10                  | 1.72E-08          |
| Formation of a pool of free 40S subunits (R-RNO-72689)                                                               | 112                                                 | 15               | 0.45                   | +                        | 33.62                         | 2.16E-18                  | 7.11E-16          |
| DARPP-32 events (R-RNO-180024)                                                                                       | 15                                                  | 2                | 0.06                   | +                        | 33.47                         | 2.04E-03                  | 3.48E-02          |

|                                                                                             |     |    |        |       |          |          |
|---------------------------------------------------------------------------------------------|-----|----|--------|-------|----------|----------|
| PKA activation (R-RNO-163615)                                                               | 15  | 2  | 0.06 + | 33.47 | 2.04E-03 | 3.45E-02 |
| PKA-mediated phosphorylation of CREB (R-RNO-111931)                                         | 15  | 2  | 0.06 + | 33.47 | 2.04E-03 | 3.41E-02 |
| Nonsense Mediated Decay (NMD) independent of the Exon Junction Complex (EJC) (R-RNO-975956) | 106 | 14 | 0.42 + | 33.15 | 3.79E-17 | 8.90E-15 |
| L13a-mediated translational silencing of Ceruloplasmin expression (R-RNO-156827)            | 122 | 16 | 0.49 + | 32.92 | 1.98E-19 | 1.63E-16 |
| SRP-dependent cotranslational protein targeting to membrane (R-RNO-1799339)                 | 104 | 13 | 0.41 + | 31.38 | 1.04E-15 | 1.43E-13 |
| Post NMDA receptor activation events (R-RNO-438064)                                         | 16  | 2  | 0.06 + | 31.38 | 2.29E-03 | 3.64E-02 |
| Cap-dependent Translation Initiation (R-RNO-72737)                                          | 130 | 16 | 0.52 + | 30.89 | 5.01E-19 | 2.74E-16 |
| Eukaryotic Translation Initiation (R-RNO-72613)                                             | 130 | 16 | 0.52 + | 30.89 | 5.01E-19 | 2.06E-16 |
| GTP hydrolysis and joining of the 60S ribosomal subunit (R-RNO-72706)                       | 123 | 15 | 0.49 + | 30.61 | 7.81E-18 | 2.14E-15 |
| Tristetraprolin (TTP, ZFP36) binds and destabilizes mRNA (R-RNO-450513)                     | 17  | 2  | 0.07 + | 29.53 | 2.55E-03 | 3.73E-02 |
| Nonsense Mediated Decay (NMD) enhanced by the Exon Junction Complex (EJC) (R-RNO-975957)    | 125 | 14 | 0.5 +  | 28.11 | 3.13E-16 | 5.71E-14 |
| Nonsense-Mediated Decay (NMD) (R-RNO-927802)                                                | 125 | 14 | 0.5 +  | 28.11 | 3.13E-16 | 5.14E-14 |
| Activation of BH3-only proteins (R-RNO-114452)                                              | 18  | 2  | 0.07 + | 27.89 | 2.82E-03 | 4.00E-02 |
| Synthesis of active ubiquitin: roles of E1 and E2 enzymes (R-RNO-8866652)                   | 29  | 3  | 0.12 + | 25.97 | 2.75E-04 | 1.08E-02 |
| FOXO-mediated transcription (R-RNO-9614085)                                                 | 20  | 2  | 0.08 + | 25.1  | 3.41E-03 | 4.38E-02 |
| Downregulation of SMAD2/3:SMAD4 transcriptional activity (R-RNO-2173795)                    | 20  | 2  | 0.08 + | 25.1  | 3.41E-03 | 4.35E-02 |
| Oxygen-dependent proline hydroxylation of Hypoxia-inducible Factor Alpha (R-RNO-1234176)    | 62  | 5  | 0.25 + | 20.24 | 6.96E-06 | 4.40E-04 |
| Cellular response to hypoxia (R-RNO-1234174)                                                | 66  | 5  | 0.26 + | 19.02 | 9.27E-06 | 5.64E-04 |
| AUF1 (hnRNP D0) binds and destabilizes mRNA (R-RNO-450408)                                  | 54  | 4  | 0.22 + | 18.59 | 8.33E-05 | 4.02E-03 |
| Regulation of mRNA stability by proteins that bind AU-rich elements (R-RNO-450531)          | 83  | 6  | 0.33 + | 18.14 | 1.46E-06 | 9.59E-05 |

|                                                                                      |     |    |        |       |          |          |
|--------------------------------------------------------------------------------------|-----|----|--------|-------|----------|----------|
| Translation (R-RNO-72766)                                                            | 236 | 17 | 0.94 + | 18.08 | 1.57E-16 | 3.23E-14 |
| rRNA processing in the nucleus and cytosol (R-RNO-8868773)                           | 189 | 13 | 0.75 + | 17.26 | 1.30E-12 | 1.65E-10 |
| rRNA processing (R-RNO-72312)                                                        | 189 | 13 | 0.75 + | 17.26 | 1.30E-12 | 1.53E-10 |
| Major pathway of rRNA processing in the nucleolus and cytosol (R-RNO-6791226)        | 189 | 13 | 0.75 + | 17.26 | 1.30E-12 | 1.43E-10 |
| RAB geranylgeranylation (R-RNO-8873719)                                              | 59  | 4  | 0.24 + | 17.02 | 1.15E-04 | 5.40E-03 |
| Protein ubiquitination (R-RNO-8852135)                                               | 61  | 4  | 0.24 + | 16.46 | 1.30E-04 | 5.77E-03 |
| TP53 Regulates Metabolic Genes (R-RNO-5628897)                                       | 47  | 3  | 0.19 + | 16.02 | 1.03E-03 | 2.78E-02 |
| Cross-presentation of soluble exogenous antigens (endosomes) (R-RNO-1236978)         | 48  | 3  | 0.19 + | 15.69 | 1.09E-03 | 2.77E-02 |
| Ubiquitin-dependent degradation of Cyclin D (R-RNO-75815)                            | 49  | 3  | 0.2 +  | 15.37 | 1.16E-03 | 2.88E-02 |
| COPI-independent Golgi-to-ER retrograde traffic (R-RNO-6811436)                      | 49  | 3  | 0.2 +  | 15.37 | 1.16E-03 | 2.84E-02 |
| Regulation of RUNX2 expression and activity (R-RNO-8939902)                          | 49  | 3  | 0.2 +  | 15.37 | 1.16E-03 | 2.80E-02 |
| Regulation of ornithine decarboxylase (ODC) (R-RNO-350562)                           | 50  | 3  | 0.2 +  | 15.06 | 1.22E-03 | 2.91E-02 |
| p53-Independent G1/S DNA damage checkpoint (R-RNO-69613)                             | 50  | 3  | 0.2 +  | 15.06 | 1.22E-03 | 2.87E-02 |
| p53-Independent DNA Damage Response (R-RNO-69610)                                    | 50  | 3  | 0.2 +  | 15.06 | 1.22E-03 | 2.83E-02 |
| Ubiquitin Mediated Degradation of Phosphorylated Cdc25A (R-RNO-69601)                | 50  | 3  | 0.2 +  | 15.06 | 1.22E-03 | 2.79E-02 |
| Autodegradation of the E3 ubiquitin ligase COP1 (R-RNO-349425)                       | 50  | 3  | 0.2 +  | 15.06 | 1.22E-03 | 2.75E-02 |
| Regulation of RUNX3 expression and activity (R-RNO-8941858)                          | 51  | 3  | 0.2 +  | 14.76 | 1.29E-03 | 2.83E-02 |
| Degradation of AXIN (R-RNO-4641257)                                                  | 52  | 3  | 0.21 + | 14.48 | 1.36E-03 | 2.95E-02 |
| FBXL7 down-regulates AURKA during mitotic entry and in early mitosis (R-RNO-8854050) | 53  | 3  | 0.21 + | 14.21 | 1.44E-03 | 2.95E-02 |
| Degradation of GLI1 by the proteasome (R-RNO-5610780)                                | 54  | 3  | 0.22 + | 13.94 | 1.51E-03 | 3.07E-02 |
| Stabilization of p53 (R-RNO-69541)                                                   | 54  | 3  | 0.22 + | 13.94 | 1.51E-03 | 3.03E-02 |
| Degradation of DVL (R-RNO-4641258)                                                   | 55  | 3  | 0.22 + | 13.69 | 1.59E-03 | 3.15E-02 |

|                                                                                            |     |   |        |       |          |          |
|--------------------------------------------------------------------------------------------|-----|---|--------|-------|----------|----------|
| GLI3 is processed to GLI3R by the proteasome (R-RNO-5610785)                               | 55  | 3 | 0.22 + | 13.69 | 1.59E-03 | 3.11E-02 |
| Dectin-1 mediated noncanonical NF-kB signaling (R-RNO-5607761)                             | 56  | 3 | 0.22 + | 13.45 | 1.67E-03 | 3.23E-02 |
| NIK-->noncanonical NF-kB signaling (R-RNO-5676590)                                         | 56  | 3 | 0.22 + | 13.45 | 1.67E-03 | 3.19E-02 |
| CDT1 association with the CDC6:ORC:origin complex (R-RNO-68827)                            | 57  | 3 | 0.23 + | 13.21 | 1.75E-03 | 3.31E-02 |
| COPI-mediated anterograde transport (R-RNO-6807878)                                        | 96  | 5 | 0.38 + | 13.07 | 5.14E-05 | 2.81E-03 |
| Metabolism of polyamines (R-RNO-351202)                                                    | 58  | 3 | 0.23 + | 12.98 | 1.84E-03 | 3.39E-02 |
| Activation of NF-kappaB in B cells (R-RNO-1169091)                                         | 59  | 3 | 0.24 + | 12.76 | 1.93E-03 | 3.48E-02 |
| SCF(Skp2)-mediated degradation of p27/p21 (R-RNO-187577)                                   | 59  | 3 | 0.24 + | 12.76 | 1.93E-03 | 3.44E-02 |
| Asymmetric localization of PCP proteins (R-RNO-4608870)                                    | 60  | 3 | 0.24 + | 12.55 | 2.02E-03 | 3.56E-02 |
| Hedgehog ligand biogenesis (R-RNO-5358346)                                                 | 60  | 3 | 0.24 + | 12.55 | 2.02E-03 | 3.52E-02 |
| Transcriptional regulation by RUNX2 (R-RNO-8878166)                                        | 60  | 3 | 0.24 + | 12.55 | 2.02E-03 | 3.49E-02 |
| Autodegradation of Cdh1 by Cdh1:APC/C (R-RNO-174084)                                       | 61  | 3 | 0.24 + | 12.34 | 2.11E-03 | 3.47E-02 |
| Hedgehog 'off' state (R-RNO-5610787)                                                       | 105 | 5 | 0.42 + | 11.95 | 7.72E-05 | 3.96E-03 |
| p53-Dependent G1/S DNA damage checkpoint (R-RNO-69580)                                     | 63  | 3 | 0.25 + | 11.95 | 2.31E-03 | 3.64E-02 |
| p53-Dependent G1 DNA Damage Response (R-RNO-69563)                                         | 63  | 3 | 0.25 + | 11.95 | 2.31E-03 | 3.60E-02 |
| CLEC7A (Dectin-1) signaling (R-RNO-5607764)                                                | 85  | 4 | 0.34 + | 11.81 | 4.36E-04 | 1.49E-02 |
| Peroxisomal protein import (R-RNO-9033241)                                                 | 64  | 3 | 0.25 + | 11.77 | 2.41E-03 | 3.69E-02 |
| Assembly of the pre-replicative complex (R-RNO-68867)                                      | 64  | 3 | 0.25 + | 11.77 | 2.41E-03 | 3.66E-02 |
| RUNX1 regulates transcription of genes involved in differentiation of HSCs (R-RNO-8939236) | 65  | 3 | 0.26 + | 11.58 | 2.51E-03 | 3.78E-02 |
| G1/S DNA Damage Checkpoints (R-RNO-69615)                                                  | 65  | 3 | 0.26 + | 11.58 | 2.51E-03 | 3.75E-02 |
| APC/C:Cdc20 mediated degradation of Securin (R-RNO-174154)                                 | 65  | 3 | 0.26 + | 11.58 | 2.51E-03 | 3.71E-02 |
| Regulation of RAS by GAPs (R-RNO-5658442)                                                  | 66  | 3 | 0.26 + | 11.41 | 2.62E-03 | 3.80E-02 |

|                                                                                                                         |     |   |        |       |          |          |
|-------------------------------------------------------------------------------------------------------------------------|-----|---|--------|-------|----------|----------|
| Downstream TCR signaling (R-RNO-202424)                                                                                 | 89  | 4 | 0.35 + | 11.28 | 5.16E-04 | 1.69E-02 |
| Regulation of PTEN stability and activity (R-RNO-8948751)                                                               | 67  | 3 | 0.27 + | 11.24 | 2.73E-03 | 3.89E-02 |
| Orc1 removal from chromatin (R-RNO-68949)                                                                               | 68  | 3 | 0.27 + | 11.07 | 2.84E-03 | 3.98E-02 |
| Cyclin E associated events during G1/S transition (R-RNO-69202)                                                         | 68  | 3 | 0.27 + | 11.07 | 2.84E-03 | 3.95E-02 |
| Factors involved in megakaryocyte development and platelet production (R-RNO-983231)                                    | 115 | 5 | 0.46 + | 10.91 | 1.17E-04 | 5.32E-03 |
| MAPK6/MAPK4 signaling (R-RNO-5687128)                                                                                   | 70  | 3 | 0.28 + | 10.76 | 3.07E-03 | 4.20E-02 |
| CDK-mediated phosphorylation and removal of Cdc6 (R-RNO-69017)                                                          | 70  | 3 | 0.28 + | 10.76 | 3.07E-03 | 4.17E-02 |
| Cyclin A:Cdk2-associated events at S phase entry (R-RNO-69656)                                                          | 70  | 3 | 0.28 + | 10.76 | 3.07E-03 | 4.13E-02 |
| Cdc20:Phospho-APC/C mediated degradation of Cyclin A (R-RNO-174184)                                                     | 70  | 3 | 0.28 + | 10.76 | 3.07E-03 | 4.10E-02 |
| APC/C:Cdh1 mediated degradation of Cdc20 and other APC/C:Cdh1 targeted proteins in late mitosis/early G1 (R-RNO-174178) | 70  | 3 | 0.28 + | 10.76 | 3.07E-03 | 4.07E-02 |
| APC:Cdc20 mediated degradation of cell cycle proteins prior to satisfaction of the cell cycle checkpoint (R-RNO-179419) | 71  | 3 | 0.28 + | 10.61 | 3.19E-03 | 4.19E-02 |
| Downstream signaling events of B Cell Receptor (BCR) (R-RNO-1168372)                                                    | 71  | 3 | 0.28 + | 10.61 | 3.19E-03 | 4.16E-02 |
| The role of GTSE1 in G2/M progression after G2 checkpoint (R-RNO-8852276)                                               | 72  | 3 | 0.29 + | 10.46 | 3.32E-03 | 4.29E-02 |
| ER to Golgi Anterograde Transport (R-RNO-199977)                                                                        | 146 | 6 | 0.58 + | 10.32 | 3.19E-05 | 1.81E-03 |
| APC/C:Cdc20 mediated degradation of mitotic proteins (R-RNO-176409)                                                     | 73  | 3 | 0.29 + | 10.32 | 3.44E-03 | 4.35E-02 |
| UCH proteinases (R-RNO-5689603)                                                                                         | 74  | 3 | 0.29 + | 10.18 | 3.57E-03 | 4.48E-02 |
| Activation of APC/C and APC/C:Cdc20 mediated degradation of mitotic proteins (R-RNO-176814)                             | 74  | 3 | 0.29 + | 10.18 | 3.57E-03 | 4.44E-02 |
| Transcriptional regulation by RUNX3 (R-RNO-8878159)                                                                     | 74  | 3 | 0.29 + | 10.18 | 3.57E-03 | 4.41E-02 |
| Degradation of beta-catenin by the destruction complex (R-RNO-195253)                                                   | 76  | 3 | 0.3 +  | 9.91  | 3.84E-03 | 4.70E-02 |
| Golgi-to-ER retrograde transport (R-RNO-8856688)                                                                        | 127 | 5 | 0.51 + | 9.88  | 1.82E-04 | 7.48E-03 |

|                                                                   |      |    |        |      |          |          |
|-------------------------------------------------------------------|------|----|--------|------|----------|----------|
| Apoptosis (R-RNO-109581)                                          | 102  | 4  | 0.41 + | 9.84 | 8.44E-04 | 2.39E-02 |
| Metabolism of RNA (R-RNO-8953854)                                 | 563  | 22 | 2.24 + | 9.81 | 7.06E-16 | 1.05E-13 |
| Antigen processing-Cross presentation (R-RNO-1236975)             | 78   | 3  | 0.31 + | 9.65 | 4.12E-03 | 4.94E-02 |
| C-type lectin receptors (CLRs) (R-RNO-5621481)                    | 104  | 4  | 0.41 + | 9.65 | 9.05E-04 | 2.52E-02 |
| TCR signaling (R-RNO-202403)                                      | 108  | 4  | 0.43 + | 9.3  | 1.04E-03 | 2.74E-02 |
| Programmed Cell Death (R-RNO-5357801)                             | 108  | 4  | 0.43 + | 9.3  | 1.04E-03 | 2.70E-02 |
| Signaling by Hedgehog (R-RNO-5358351)                             | 136  | 5  | 0.54 + | 9.23 | 2.48E-04 | 9.92E-03 |
| G2/M Checkpoints (R-RNO-69481)                                    | 143  | 5  | 0.57 + | 8.78 | 3.10E-04 | 1.18E-02 |
| Transport to the Golgi and subsequent modification (R-RNO-948021) | 174  | 6  | 0.69 + | 8.66 | 8.19E-05 | 4.08E-03 |
| Ub-specific processing proteases (R-RNO-5689880)                  | 158  | 5  | 0.63 + | 7.94 | 4.82E-04 | 1.62E-02 |
| FCER1 mediated NF- $\kappa$ B activation (R-RNO-2871837)          | 131  | 4  | 0.52 + | 7.66 | 2.06E-03 | 3.42E-02 |
| Clathrin-mediated endocytosis (R-RNO-8856828)                     | 141  | 4  | 0.56 + | 7.12 | 2.67E-03 | 3.85E-02 |
| G2/M Transition (R-RNO-69275)                                     | 177  | 5  | 0.71 + | 7.09 | 7.95E-04 | 2.33E-02 |
| Mitotic G2-G2/M phases (R-RNO-453274)                             | 178  | 5  | 0.71 + | 7.05 | 8.14E-04 | 2.35E-02 |
| Intra-Golgi and retrograde Golgi-to-ER traffic (R-RNO-6811442)    | 186  | 5  | 0.74 + | 6.75 | 9.86E-04 | 2.70E-02 |
| RAF/MAP kinase cascade (R-RNO-5673001)                            | 233  | 6  | 0.93 + | 6.46 | 3.81E-04 | 1.36E-02 |
| MAPK1/MAPK3 signaling (R-RNO-5684996)                             | 239  | 6  | 0.95 + | 6.3  | 4.34E-04 | 1.52E-02 |
| Neutrophil degranulation (R-RNO-6798695)                          | 489  | 12 | 1.95 + | 6.16 | 6.62E-07 | 4.53E-05 |
| FLT3 Signaling (R-RNO-9607240)                                    | 248  | 6  | 0.99 + | 6.07 | 5.25E-04 | 1.69E-02 |
| Asparagine N-linked glycosylation (R-RNO-446203)                  | 257  | 6  | 1.02 + | 5.86 | 6.30E-04 | 1.95E-02 |
| Metabolism of proteins (R-RNO-392499)                             | 1603 | 37 | 6.39 + | 5.79 | 1.68E-19 | 2.76E-16 |
| Cell Cycle Checkpoints (R-RNO-69620)                              | 260  | 6  | 1.04 + | 5.79 | 6.69E-04 | 2.03E-02 |
| Neddylation (R-RNO-8951664)                                       | 217  | 5  | 0.86 + | 5.78 | 1.92E-03 | 3.50E-02 |

|                                                                            |      |    |        |      |          |          |
|----------------------------------------------------------------------------|------|----|--------|------|----------|----------|
| MAPK family signaling cascades (R-RNO-5683057)                             | 261  | 6  | 1.04 + | 5.77 | 6.82E-04 | 2.04E-02 |
| Deubiquitination (R-RNO-5688426)                                           | 225  | 5  | 0.9 +  | 5.58 | 2.23E-03 | 3.63E-02 |
| Antigen processing: Ubiquitination & Proteasome degradation (R-RNO-983168) | 286  | 6  | 1.14 + | 5.27 | 1.08E-03 | 2.78E-02 |
| Cellular responses to stress (R-RNO-2262752)                               | 385  | 8  | 1.53 + | 5.22 | 1.68E-04 | 7.28E-03 |
| Cellular responses to external stimuli (R-RNO-8953897)                     | 387  | 8  | 1.54 + | 5.19 | 1.74E-04 | 7.34E-03 |
| Membrane Trafficking (R-RNO-199991)                                        | 553  | 11 | 2.2 +  | 4.99 | 1.41E-05 | 8.26E-04 |
| Intracellular signaling by second messengers (R-RNO-9006925)               | 257  | 5  | 1.02 + | 4.88 | 3.91E-03 | 4.72E-02 |
| Innate Immune System (R-RNO-168249)                                        | 938  | 17 | 3.74 + | 4.55 | 1.75E-07 | 1.31E-05 |
| Class I MHC mediated antigen processing & presentation (R-RNO-983169)      | 332  | 6  | 1.32 + | 4.54 | 2.27E-03 | 3.66E-02 |
| M Phase (R-RNO-68886)                                                      | 333  | 6  | 1.33 + | 4.52 | 2.31E-03 | 3.57E-02 |
| Vesicle-mediated transport (R-RNO-5653656)                                 | 642  | 11 | 2.56 + | 4.3  | 5.38E-05 | 2.85E-03 |
| Post-translational protein modification (R-RNO-597592)                     | 1218 | 20 | 4.85 + | 4.12 | 5.79E-08 | 4.53E-06 |
| Cell Cycle (R-RNO-1640170)                                                 | 525  | 8  | 2.09 + | 3.82 | 1.26E-03 | 2.79E-02 |
| Immune System (R-RNO-168256)                                               | 1739 | 23 | 6.93 + | 3.32 | 2.33E-07 | 1.66E-05 |
| Adaptive Immune System (R-RNO-1280218)                                     | 745  | 9  | 2.97 + | 3.03 | 3.00E-03 | 4.14E-02 |
| Metabolism (R-RNO-1430728)                                                 | 1713 | 15 | 6.82 + | 2.2  | 3.89E-03 | 4.73E-02 |

Analysis Type: PANTHER Overrepresentation Test (Released 20210224)

Annotation Version and Release Date: Reactome version 65 Released 2020-11-17

Analyzed List: upload\_1 (Mus musculus)

Reference List: Mus musculus (all genes in database)

Test Type: FISHER

Correction: FDR

| Reactome pathways                                                                                                    | Mus musculus -<br>REFLIST (21988) | upload_1<br>(89) | upload_1<br>(expected) | upload_1<br>(over/under) | upload_1 (fold<br>Enrichment) | upload_1 (raw<br>P-value) | upload_1<br>(FDR) |
|----------------------------------------------------------------------------------------------------------------------|-----------------------------------|------------------|------------------------|--------------------------|-------------------------------|---------------------------|-------------------|
| CREB1 phosphorylation through the activation of Adenylate Cyclase (R-MMU-442720)                                     | 5                                 | 2                | 0.02                   | +                        | 98.82                         | 3.33E-04                  | 1.25E-02          |
| PKA activation in glucagon signalling (R-MMU-164378)                                                                 | 5                                 | 2                | 0.02                   | +                        | 98.82                         | 3.33E-04                  | 1.22E-02          |
| Glucagon signaling in metabolic regulation (R-MMU-163359)                                                            | 7                                 | 2                | 0.03                   | +                        | 70.59                         | 5.68E-04                  | 1.87E-02          |
| Regulation of localization of FOXO transcription factors (R-MMU-9614399)                                             | 12                                | 2                | 0.05                   | +                        | 41.18                         | 1.42E-03                  | 3.12E-02          |
| Activation of BAD and translocation to mitochondria (R-MMU-111447)                                                   | 12                                | 2                | 0.05                   | +                        | 41.18                         | 1.42E-03                  | 3.07E-02          |
| Chk1/Chk2(Cds1) mediated inactivation of Cyclin B:Cdk1 complex (R-MMU-75035)                                         | 12                                | 2                | 0.05                   | +                        | 41.18                         | 1.42E-03                  | 3.03E-02          |
| Nonsense Mediated Decay (NMD) independent of the Exon Junction Complex (EJC) (R-MMU-975956)                          | 91                                | 14               | 0.37                   | +                        | 38.01                         | 7.02E-18                  | 1.45E-15          |
| Formation of the ternary complex, and subsequently, the 43S complex (R-MMU-72695)                                    | 52                                | 8                | 0.21                   | +                        | 38.01                         | 1.09E-10                  | 9.47E-09          |
| Formation of a pool of free 40S subunits (R-MMU-72689)                                                               | 98                                | 15               | 0.4                    | +                        | 37.81                         | 4.62E-19                  | 1.90E-16          |
| Translation initiation complex formation (R-MMU-72649)                                                               | 59                                | 9                | 0.24                   | +                        | 37.69                         | 7.54E-12                  | 7.31E-10          |
| Activation of the mRNA upon binding of the cap-binding complex and eIFs, and subsequent binding to 43S (R-MMU-72662) | 60                                | 9                | 0.24                   | +                        | 37.06                         | 8.64E-12                  | 7.91E-10          |
| L13a-mediated translational silencing of Ceruloplasmin expression (R-MMU-156827)                                     | 108                               | 16               | 0.44                   | +                        | 36.6                          | 4.52E-20                  | 7.46E-17          |
| SRP-dependent cotranslational protein targeting to membrane (R-MMU-1799339)                                          | 89                                | 13               | 0.36                   | +                        | 36.09                         | 2.09E-16                  | 2.87E-14          |

|                                                                                          |     |    |        |       |          |          |
|------------------------------------------------------------------------------------------|-----|----|--------|-------|----------|----------|
| Cap-dependent Translation Initiation (R-MMU-72737)                                       | 116 | 16 | 0.47 + | 34.08 | 1.28E-19 | 1.05E-16 |
| Eukaryotic Translation Initiation (R-MMU-72613)                                          | 116 | 16 | 0.47 + | 34.08 | 1.28E-19 | 7.03E-17 |
| GTP hydrolysis and joining of the 60S ribosomal subunit (R-MMU-72706)                    | 109 | 15 | 0.44 + | 34    | 1.97E-18 | 5.40E-16 |
| Ribosomal scanning and start codon recognition (R-MMU-72702)                             | 59  | 8  | 0.24 + | 33.5  | 2.72E-10 | 2.24E-08 |
| DARPP-32 events (R-MMU-180024)                                                           | 15  | 2  | 0.06 + | 32.94 | 2.10E-03 | 3.69E-02 |
| Pentose phosphate pathway (R-MMU-71336)                                                  | 15  | 2  | 0.06 + | 32.94 | 2.10E-03 | 3.65E-02 |
| PKA activation (R-MMU-163615)                                                            | 15  | 2  | 0.06 + | 32.94 | 2.10E-03 | 3.61E-02 |
| PKA-mediated phosphorylation of CREB (R-MMU-111931)                                      | 15  | 2  | 0.06 + | 32.94 | 2.10E-03 | 3.57E-02 |
| Nonsense Mediated Decay (NMD) enhanced by the Exon Junction Complex (EJC) (R-MMU-975957) | 112 | 14 | 0.45 + | 30.88 | 9.87E-17 | 1.63E-14 |
| Nonsense-Mediated Decay (NMD) (R-MMU-927802)                                             | 112 | 14 | 0.45 + | 30.88 | 9.87E-17 | 1.48E-14 |
| Post NMDA receptor activation events (R-MMU-438064)                                      | 16  | 2  | 0.06 + | 30.88 | 2.36E-03 | 3.77E-02 |
| Tristetraprolin (TTP, ZFP36) binds and destabilizes mRNA (R-MMU-450513)                  | 17  | 2  | 0.07 + | 29.07 | 2.63E-03 | 3.98E-02 |
| Activation of BH3-only proteins (R-MMU-114452)                                           | 18  | 2  | 0.07 + | 27.45 | 2.91E-03 | 4.21E-02 |
| IKK complex recruitment mediated by RIP1 (R-MMU-937041)                                  | 20  | 2  | 0.08 + | 24.71 | 3.52E-03 | 4.61E-02 |
| Synthesis of active ubiquitin: roles of E1 and E2 enzymes (R-MMU-8866652)                | 30  | 3  | 0.12 + | 24.71 | 3.17E-04 | 1.24E-02 |
| Oxygen-dependent proline hydroxylation of Hypoxia-inducible Factor Alpha (R-MMU-1234176) | 65  | 5  | 0.26 + | 19    | 9.36E-06 | 5.51E-04 |
| Translation (R-MMU-72766)                                                                | 224 | 17 | 0.91 + | 18.75 | 9.49E-17 | 1.74E-14 |
| Major pathway of rRNA processing in the nucleolus and cytosol (R-MMU-6791226)            | 174 | 13 | 0.7 +  | 18.46 | 6.09E-13 | 7.72E-11 |
| rRNA processing in the nucleus and cytosol (R-MMU-8868773)                               | 174 | 13 | 0.7 +  | 18.46 | 6.09E-13 | 7.17E-11 |
| rRNA processing (R-MMU-72312)                                                            | 174 | 13 | 0.7 +  | 18.46 | 6.09E-13 | 6.69E-11 |
| AUF1 (hnRNP D0) binds and destabilizes mRNA (R-MMU-450408)                               | 55  | 4  | 0.22 + | 17.97 | 9.48E-05 | 4.74E-03 |

|                                                                                      |    |   |        |       |          |          |
|--------------------------------------------------------------------------------------|----|---|--------|-------|----------|----------|
| Cellular response to hypoxia (R-MMU-1234174)                                         | 70 | 5 | 0.28 + | 17.65 | 1.31E-05 | 7.47E-04 |
| Regulation of mRNA stability by proteins that bind AU-rich elements (R-MMU-450531)   | 85 | 6 | 0.34 + | 17.44 | 1.83E-06 | 1.21E-04 |
| RAB geranylgeranylation (R-MMU-8873719)                                              | 62 | 4 | 0.25 + | 15.94 | 1.47E-04 | 6.73E-03 |
| Cross-presentation of soluble exogenous antigens (endosomes) (R-MMU-1236978)         | 48 | 3 | 0.19 + | 15.44 | 1.15E-03 | 3.00E-02 |
| Protein ubiquitination (R-MMU-8852135)                                               | 64 | 4 | 0.26 + | 15.44 | 1.65E-04 | 7.36E-03 |
| TP53 Regulates Metabolic Genes (R-MMU-5628897)                                       | 49 | 3 | 0.2 +  | 15.13 | 1.21E-03 | 3.08E-02 |
| COPI-independent Golgi-to-ER retrograde traffic (R-MMU-6811436)                      | 49 | 3 | 0.2 +  | 15.13 | 1.21E-03 | 3.03E-02 |
| Ubiquitin-dependent degradation of Cyclin D (R-MMU-75815)                            | 50 | 3 | 0.2 +  | 14.82 | 1.28E-03 | 3.16E-02 |
| Regulation of RUNX2 expression and activity (R-MMU-8939902)                          | 50 | 3 | 0.2 +  | 14.82 | 1.28E-03 | 3.11E-02 |
| Regulation of ornithine decarboxylase (ODC) (R-MMU-350562)                           | 50 | 3 | 0.2 +  | 14.82 | 1.28E-03 | 3.06E-02 |
| Autodegradation of the E3 ubiquitin ligase COP1 (R-MMU-349425)                       | 51 | 3 | 0.21 + | 14.53 | 1.35E-03 | 3.14E-02 |
| p53-Independent G1/S DNA damage checkpoint (R-MMU-69613)                             | 51 | 3 | 0.21 + | 14.53 | 1.35E-03 | 3.10E-02 |
| p53-Independent DNA Damage Response (R-MMU-69610)                                    | 51 | 3 | 0.21 + | 14.53 | 1.35E-03 | 3.06E-02 |
| Ubiquitin Mediated Degradation of Phosphorylated Cdc25A (R-MMU-69601)                | 51 | 3 | 0.21 + | 14.53 | 1.35E-03 | 3.02E-02 |
| Regulation of RUNX3 expression and activity (R-MMU-8941858)                          | 53 | 3 | 0.21 + | 13.98 | 1.50E-03 | 3.10E-02 |
| Degradation of AXIN (R-MMU-4641257)                                                  | 54 | 3 | 0.22 + | 13.73 | 1.58E-03 | 3.22E-02 |
| FBXL7 down-regulates AURKA during mitotic entry and in early mitosis (R-MMU-8854050) | 54 | 3 | 0.22 + | 13.73 | 1.58E-03 | 3.18E-02 |
| Degradation of GLI1 by the proteasome (R-MMU-5610780)                                | 55 | 3 | 0.22 + | 13.48 | 1.66E-03 | 3.31E-02 |
| Stabilization of p53 (R-MMU-69541)                                                   | 55 | 3 | 0.22 + | 13.48 | 1.66E-03 | 3.27E-02 |
| Golgi Associated Vesicle Biogenesis (R-MMU-432722)                                   | 55 | 3 | 0.22 + | 13.48 | 1.66E-03 | 3.23E-02 |
| GLI3 is processed to GLI3R by the proteasome (R-MMU-5610785)                         | 56 | 3 | 0.23 + | 13.24 | 1.75E-03 | 3.32E-02 |
| Degradation of DVL (R-MMU-4641258)                                                   | 56 | 3 | 0.23 + | 13.24 | 1.75E-03 | 3.28E-02 |

|                                                                                            |     |   |        |       |          |          |
|--------------------------------------------------------------------------------------------|-----|---|--------|-------|----------|----------|
| NIK-->noncanonical NF-kB signaling (R-MMU-5676590)                                         | 57  | 3 | 0.23 + | 13    | 1.84E-03 | 3.40E-02 |
| Dectin-1 mediated noncanonical NF-kB signaling (R-MMU-5607761)                             | 57  | 3 | 0.23 + | 13    | 1.84E-03 | 3.36E-02 |
| COPI-mediated anterograde transport (R-MMU-6807878)                                        | 96  | 5 | 0.39 + | 12.87 | 5.55E-05 | 2.95E-03 |
| Metabolism of polyamines (R-MMU-351202)                                                    | 58  | 3 | 0.23 + | 12.78 | 1.93E-03 | 3.45E-02 |
| CDT1 association with the CDC6:ORC:origin complex (R-MMU-68827)                            | 58  | 3 | 0.23 + | 12.78 | 1.93E-03 | 3.41E-02 |
| SCF(Skp2)-mediated degradation of p27/p21 (R-MMU-187577)                                   | 60  | 3 | 0.24 + | 12.35 | 2.11E-03 | 3.55E-02 |
| Transcriptional regulation by RUNX2 (R-MMU-8878166)                                        | 61  | 3 | 0.25 + | 12.15 | 2.21E-03 | 3.68E-02 |
| Asymmetric localization of PCP proteins (R-MMU-4608870)                                    | 61  | 3 | 0.25 + | 12.15 | 2.21E-03 | 3.64E-02 |
| Autodegradation of Cdh1 by Cdh1:APC/C (R-MMU-174084)                                       | 62  | 3 | 0.25 + | 11.95 | 2.31E-03 | 3.77E-02 |
| Hedgehog ligand biogenesis (R-MMU-5358346)                                                 | 62  | 3 | 0.25 + | 11.95 | 2.31E-03 | 3.73E-02 |
| Hedgehog 'off' state (R-MMU-5610787)                                                       | 106 | 5 | 0.43 + | 11.65 | 8.70E-05 | 4.49E-03 |
| p53-Dependent G1/S DNA damage checkpoint (R-MMU-69580)                                     | 64  | 3 | 0.26 + | 11.58 | 2.52E-03 | 3.95E-02 |
| p53-Dependent G1 DNA Damage Response (R-MMU-69563)                                         | 64  | 3 | 0.26 + | 11.58 | 2.52E-03 | 3.92E-02 |
| Activation of NF-kappaB in B cells (R-MMU-1169091)                                         | 64  | 3 | 0.26 + | 11.58 | 2.52E-03 | 3.88E-02 |
| Peroxisomal protein import (R-MMU-9033241)                                                 | 65  | 3 | 0.26 + | 11.4  | 2.63E-03 | 4.01E-02 |
| CLEC7A (Dectin-1) signaling (R-MMU-5607764)                                                | 87  | 4 | 0.35 + | 11.36 | 5.05E-04 | 1.73E-02 |
| APC/C:Cdc20 mediated degradation of Securin (R-MMU-174154)                                 | 66  | 3 | 0.27 + | 11.23 | 2.74E-03 | 4.10E-02 |
| G1/S DNA Damage Checkpoints (R-MMU-69615)                                                  | 66  | 3 | 0.27 + | 11.23 | 2.74E-03 | 4.07E-02 |
| RUNX1 regulates transcription of genes involved in differentiation of HSCs (R-MMU-8939236) | 66  | 3 | 0.27 + | 11.23 | 2.74E-03 | 4.03E-02 |
| Assembly of the pre-replicative complex (R-MMU-68867)                                      | 67  | 3 | 0.27 + | 11.06 | 2.85E-03 | 4.16E-02 |
| Regulation of PTEN stability and activity (R-MMU-8948751)                                  | 68  | 3 | 0.28 + | 10.9  | 2.97E-03 | 4.26E-02 |
| Regulation of RAS by GAPs (R-MMU-5658442)                                                  | 68  | 3 | 0.28 + | 10.9  | 2.97E-03 | 4.22E-02 |

|                                                                                                                         |     |    |        |       |          |          |
|-------------------------------------------------------------------------------------------------------------------------|-----|----|--------|-------|----------|----------|
| Cyclin E associated events during G1/S transition (R-MMU-69202)                                                         | 70  | 3  | 0.28 + | 10.59 | 3.21E-03 | 4.53E-02 |
| Orc1 removal from chromatin (R-MMU-68949)                                                                               | 70  | 3  | 0.28 + | 10.59 | 3.21E-03 | 4.49E-02 |
| Metabolism of RNA (R-MMU-8953854)                                                                                       | 564 | 24 | 2.28 + | 10.51 | 6.55E-18 | 1.54E-15 |
| trans-Golgi Network Vesicle Budding (R-MMU-199992)                                                                      | 71  | 3  | 0.29 + | 10.44 | 3.34E-03 | 4.59E-02 |
| CDK-mediated phosphorylation and removal of Cdc6 (R-MMU-69017)                                                          | 71  | 3  | 0.29 + | 10.44 | 3.34E-03 | 4.55E-02 |
| Cdc20:Phospho-APC/C mediated degradation of Cyclin A (R-MMU-174184)                                                     | 71  | 3  | 0.29 + | 10.44 | 3.34E-03 | 4.51E-02 |
| APC/C:Cdh1 mediated degradation of Cdc20 and other APC/C:Cdh1 targeted proteins in late mitosis/early G1 (R-MMU-174178) | 71  | 3  | 0.29 + | 10.44 | 3.34E-03 | 4.48E-02 |
| Downstream TCR signaling (R-MMU-202424)                                                                                 | 95  | 4  | 0.38 + | 10.4  | 6.94E-04 | 2.20E-02 |
| Factors involved in megakaryocyte development and platelet production (R-MMU-983231)                                    | 119 | 5  | 0.48 + | 10.38 | 1.47E-04 | 6.92E-03 |
| APC:Cdc20 mediated degradation of cell cycle proteins prior to satisfaction of the cell cycle checkpoint (R-MMU-179419) | 72  | 3  | 0.29 + | 10.29 | 3.47E-03 | 4.61E-02 |
| Cyclin A:Cdk2-associated events at S phase entry (R-MMU-69656)                                                          | 72  | 3  | 0.29 + | 10.29 | 3.47E-03 | 4.58E-02 |
| MAPK6/MAPK4 signaling (R-MMU-5687128)                                                                                   | 73  | 3  | 0.3 +  | 10.15 | 3.60E-03 | 4.67E-02 |
| The role of GTSE1 in G2/M progression after G2 checkpoint (R-MMU-8852276)                                               | 73  | 3  | 0.3 +  | 10.15 | 3.60E-03 | 4.64E-02 |
| ER to Golgi Anterograde Transport (R-MMU-199977)                                                                        | 148 | 6  | 0.6 +  | 10.02 | 3.77E-05 | 2.07E-03 |
| APC/C:Cdc20 mediated degradation of mitotic proteins (R-MMU-176409)                                                     | 74  | 3  | 0.3 +  | 10.02 | 3.74E-03 | 4.70E-02 |
| Activation of APC/C and APC/C:Cdc20 mediated degradation of mitotic proteins (R-MMU-176814)                             | 75  | 3  | 0.3 +  | 9.88  | 3.87E-03 | 4.84E-02 |
| Downstream signaling events of B Cell Receptor (BCR) (R-MMU-1168372)                                                    | 76  | 3  | 0.31 + | 9.75  | 4.02E-03 | 4.98E-02 |
| Apoptosis (R-MMU-109581)                                                                                                | 104 | 4  | 0.42 + | 9.5   | 9.61E-04 | 2.83E-02 |
| Golgi-to-ER retrograde transport (R-MMU-8856688)                                                                        | 130 | 5  | 0.53 + | 9.5   | 2.18E-04 | 9.47E-03 |
| C-type lectin receptors (CLRs) (R-MMU-5621481)                                                                          | 107 | 4  | 0.43 + | 9.24  | 1.06E-03 | 2.92E-02 |

|                                                                            |      |    |        |      |          |          |
|----------------------------------------------------------------------------|------|----|--------|------|----------|----------|
| Signaling by Hedgehog (R-MMU-5358351)                                      | 138  | 5  | 0.56 + | 8.95 | 2.85E-04 | 1.21E-02 |
| Programmed Cell Death (R-MMU-5357801)                                      | 111  | 4  | 0.45 + | 8.9  | 1.21E-03 | 3.13E-02 |
| Clathrin-mediated endocytosis (R-MMU-8856828)                              | 142  | 5  | 0.57 + | 8.7  | 3.24E-04 | 1.24E-02 |
| TCR signaling (R-MMU-202403)                                               | 114  | 4  | 0.46 + | 8.67 | 1.33E-03 | 3.14E-02 |
| G2/M Checkpoints (R-MMU-69481)                                             | 146  | 5  | 0.59 + | 8.46 | 3.66E-04 | 1.31E-02 |
| FCERI mediated NF-kB activation (R-MMU-2871837)                            | 117  | 4  | 0.47 + | 8.45 | 1.46E-03 | 3.06E-02 |
| Transport to the Golgi and subsequent modification (R-MMU-948021)          | 178  | 6  | 0.72 + | 8.33 | 1.01E-04 | 4.91E-03 |
| Ub-specific processing proteases (R-MMU-5689880)                           | 182  | 5  | 0.74 + | 6.79 | 9.65E-04 | 2.79E-02 |
| G2/M Transition (R-MMU-69275)                                              | 182  | 5  | 0.74 + | 6.79 | 9.65E-04 | 2.74E-02 |
| Mitotic G2-G2/M phases (R-MMU-453274)                                      | 184  | 5  | 0.74 + | 6.71 | 1.01E-03 | 2.83E-02 |
| Intra-Golgi and retrograde Golgi-to-ER traffic (R-MMU-6811442)             | 188  | 5  | 0.76 + | 6.57 | 1.11E-03 | 2.96E-02 |
| RAF/MAP kinase cascade (R-MMU-5673001)                                     | 239  | 6  | 0.97 + | 6.2  | 4.73E-04 | 1.66E-02 |
| MAPK1/MAPK3 signaling (R-MMU-5684996)                                      | 245  | 6  | 0.99 + | 6.05 | 5.38E-04 | 1.81E-02 |
| FLT3 Signaling (R-MMU-9607240)                                             | 254  | 6  | 1.03 + | 5.84 | 6.47E-04 | 2.09E-02 |
| Membrane Trafficking (R-MMU-199991)                                        | 562  | 13 | 2.27 + | 5.71 | 5.10E-07 | 3.50E-05 |
| Asparagine N-linked glycosylation (R-MMU-446203)                           | 264  | 6  | 1.07 + | 5.61 | 7.87E-04 | 2.45E-02 |
| Metabolism of proteins (R-MMU-392499)                                      | 1639 | 37 | 6.63 + | 5.58 | 7.71E-19 | 2.54E-16 |
| Cell Cycle Checkpoints (R-MMU-69620)                                       | 266  | 6  | 1.08 + | 5.57 | 8.18E-04 | 2.50E-02 |
| MAPK family signaling cascades (R-MMU-5683057)                             | 269  | 6  | 1.09 + | 5.51 | 8.66E-04 | 2.60E-02 |
| Neddylation (R-MMU-8951664)                                                | 225  | 5  | 0.91 + | 5.49 | 2.40E-03 | 3.80E-02 |
| Neutrophil degranulation (R-MMU-6798695)                                   | 547  | 12 | 2.21 + | 5.42 | 2.49E-06 | 1.52E-04 |
| Vesicle-mediated transport (R-MMU-5653656)                                 | 638  | 13 | 2.58 + | 5.03 | 2.03E-06 | 1.29E-04 |
| Antigen processing: Ubiquitination & Proteasome degradation (R-MMU-983168) | 297  | 6  | 1.2 +  | 4.99 | 1.42E-03 | 3.01E-02 |

|                                                                       |      |    |        |      |          |          |
|-----------------------------------------------------------------------|------|----|--------|------|----------|----------|
| Deubiquitination (R-MMU-5688426)                                      | 250  | 5  | 1.01 + | 4.94 | 3.73E-03 | 4.73E-02 |
| Cellular responses to stress (R-MMU-2262752)                          | 410  | 8  | 1.66 + | 4.82 | 2.86E-04 | 1.18E-02 |
| Cellular responses to external stimuli (R-MMU-8953897)                | 412  | 8  | 1.67 + | 4.8  | 2.96E-04 | 1.19E-02 |
| Innate Immune System (R-MMU-168249)                                   | 1013 | 18 | 4.1 +  | 4.39 | 1.26E-07 | 9.90E-06 |
| M Phase (R-MMU-68886)                                                 | 353  | 6  | 1.43 + | 4.2  | 3.32E-03 | 4.60E-02 |
| Class I MHC mediated antigen processing & presentation (R-MMU-983169) | 361  | 6  | 1.46 + | 4.11 | 3.70E-03 | 4.73E-02 |
| Post-translational protein modification (R-MMU-597592)                | 1279 | 20 | 5.18 + | 3.86 | 1.72E-07 | 1.29E-05 |
| Cell Cycle (R-MMU-1640170)                                            | 550  | 8  | 2.23 + | 3.59 | 1.86E-03 | 3.37E-02 |
| Transport of small molecules (R-MMU-382551)                           | 673  | 9  | 2.72 + | 3.3  | 1.71E-03 | 3.28E-02 |
| Adaptive Immune System (R-MMU-1280218)                                | 760  | 10 | 3.08 + | 3.25 | 1.06E-03 | 2.88E-02 |
| Immune System (R-MMU-168256)                                          | 1830 | 24 | 7.41 + | 3.24 | 1.97E-07 | 1.41E-05 |
