# Supplementary material for: Salivary Exosome Proteomics and Bioinformatics Analysis in 7,12-Dimethylbenz[a]anthracene-Induced Oral Cancer with Radiation Therapy—A Syrian Golden Hamster Model
Source: Diagnostics (Basel). 2021 Dec 28;12(1):65. doi: 10.3390/diagnostics12010065 (PMC8774811; doi:10.3390/diagnostics12010065)
Supplement: Supplementary file 1 [file diagnostics-12-00065-s001.zip › Supplementary File S1.xlsx]

## Sheet: Mus musculus pathway
Analysis Type:	PANTHER Overrepresentation Test (Released 20210224)
Annotation Version and Release Date:	Reactome version 65 Released 2020-11-17
Analyzed List:	upload_1 (Mus musculus)
Reference List:	Mus musculus (all genes in database)
Test Type:	FISHER
Correction:	FDR
Reactome pathways	Mus musculus - REFLIST (21988)	upload_1 (89)	upload_1 (expected)	upload_1 (over/under)	upload_1 (fold Enrichment)	upload_1 (raw P-value)	upload_1 (FDR)
CREB1 phosphorylation through the activation of Adenylate Cyclase (R-MMU-442720)	5	2	0.02	+	98.82	0.000333	0.0125
PKA activation in glucagon signalling (R-MMU-164378)	5	2	0.02	+	98.82	0.000333	0.0122
Glucagon signaling in metabolic regulation (R-MMU-163359)	7	2	0.03	+	70.59	0.000568	0.0187
Regulation of localization of FOXO transcription factors (R-MMU-9614399)	12	2	0.05	+	41.18	0.00142	0.0312
Activation of BAD and translocation to mitochondria (R-MMU-111447)	12	2	0.05	+	41.18	0.00142	0.0307
Chk1/Chk2(Cds1) mediated inactivation of Cyclin B:Cdk1 complex (R-MMU-75035)	12	2	0.05	+	41.18	0.00142	0.0303
Nonsense Mediated Decay (NMD) independent of the Exon Junction Complex (EJC) (R-MMU-975956)	91	14	0.37	+	38.01	7.02e-18	1.45e-15
Formation of the ternary complex, and subsequently, the 43S complex (R-MMU-72695)	52	8	0.21	+	38.01	1.09e-10	9.47e-09
Formation of a pool of free 40S subunits (R-MMU-72689)	98	15	0.4	+	37.81	4.62e-19	1.9e-16
Translation initiation complex formation (R-MMU-72649)	59	9	0.24	+	37.69	7.54e-12	7.31e-10
Activation of the mRNA upon binding of the cap-binding complex and eIFs, and subsequent binding to 43S (R-MMU-72662)	60	9	0.24	+	37.06	8.64e-12	7.91e-10
L13a-mediated translational silencing of Ceruloplasmin expression (R-MMU-156827)	108	16	0.44	+	36.6	4.52e-20	7.46e-17
SRP-dependent cotranslational protein targeting to membrane (R-MMU-1799339)	89	13	0.36	+	36.09	2.09e-16	2.87e-14
Cap-dependent Translation Initiation (R-MMU-72737)	116	16	0.47	+	34.08	1.28e-19	1.05e-16
Eukaryotic Translation Initiation (R-MMU-72613)	116	16	0.47	+	34.08	1.28e-19	7.03e-17
GTP hydrolysis and joining of the 60S ribosomal subunit (R-MMU-72706)	109	15	0.44	+	34	1.97e-18	5.4e-16
Ribosomal scanning and start codon recognition (R-MMU-72702)	59	8	0.24	+	33.5	2.72e-10	2.24e-08
DARPP-32 events (R-MMU-180024)	15	2	0.06	+	32.94	0.0021	0.0369
Pentose phosphate pathway (R-MMU-71336)	15	2	0.06	+	32.94	0.0021	0.0365
PKA activation (R-MMU-163615)	15	2	0.06	+	32.94	0.0021	0.0361
PKA-mediated phosphorylation of CREB (R-MMU-111931)	15	2	0.06	+	32.94	0.0021	0.0357
Nonsense Mediated Decay (NMD) enhanced by the Exon Junction Complex (EJC) (R-MMU-975957)	112	14	0.45	+	30.88	9.87e-17	1.63e-14
Nonsense-Mediated Decay (NMD) (R-MMU-927802)	112	14	0.45	+	30.88	9.87e-17	1.48e-14
Post NMDA receptor activation events (R-MMU-438064)	16	2	0.06	+	30.88	0.00236	0.0377
Tristetraprolin (TTP, ZFP36) binds and destabilizes mRNA (R-MMU-450513)	17	2	0.07	+	29.07	0.00263	0.0398
Activation of BH3-only proteins (R-MMU-114452)	18	2	0.07	+	27.45	0.00291	0.0421
IKK complex recruitment mediated by RIP1 (R-MMU-937041)	20	2	0.08	+	24.71	0.00352	0.0461
Synthesis of active ubiquitin: roles of E1 and E2 enzymes (R-MMU-8866652)	30	3	0.12	+	24.71	0.000317	0.0124
Oxygen-dependent proline hydroxylation of Hypoxia-inducible Factor Alpha (R-MMU-1234176)	65	5	0.26	+	19	9.36e-06	0.000551
Translation (R-MMU-72766)	224	17	0.91	+	18.75	9.49e-17	1.74e-14
Major pathway of rRNA processing in the nucleolus and cytosol (R-MMU-6791226)	174	13	0.7	+	18.46	6.09e-13	7.72e-11
rRNA processing in the nucleus and cytosol (R-MMU-8868773)	174	13	0.7	+	18.46	6.09e-13	7.17e-11
rRNA processing (R-MMU-72312)	174	13	0.7	+	18.46	6.09e-13	6.69e-11
AUF1 (hnRNP D0) binds and destabilizes mRNA (R-MMU-450408)	55	4	0.22	+	17.97	9.48e-05	0.00474
Cellular response to hypoxia (R-MMU-1234174)	70	5	0.28	+	17.65	1.31e-05	0.000747
Regulation of mRNA stability by proteins that bind AU-rich elements (R-MMU-450531)	85	6	0.34	+	17.44	1.83e-06	0.000121
RAB geranylgeranylation (R-MMU-8873719)	62	4	0.25	+	15.94	0.000147	0.00673
Cross-presentation of soluble exogenous antigens (endosomes) (R-MMU-1236978)	48	3	0.19	+	15.44	0.00115	0.03
Protein ubiquitination (R-MMU-8852135)	64	4	0.26	+	15.44	0.000165	0.00736
TP53 Regulates Metabolic Genes (R-MMU-5628897)	49	3	0.2	+	15.13	0.00121	0.0308
COPI-independent Golgi-to-ER retrograde traffic (R-MMU-6811436)	49	3	0.2	+	15.13	0.00121	0.0303
Ubiquitin-dependent degradation of Cyclin D (R-MMU-75815)	50	3	0.2	+	14.82	0.00128	0.0316
Regulation of RUNX2 expression and activity (R-MMU-8939902)	50	3	0.2	+	14.82	0.00128	0.0311
Regulation of ornithine decarboxylase (ODC) (R-MMU-350562)	50	3	0.2	+	14.82	0.00128	0.0306
Autodegradation of the E3 ubiquitin ligase COP1 (R-MMU-349425)	51	3	0.21	+	14.53	0.00135	0.0314
p53-Independent G1/S DNA damage checkpoint (R-MMU-69613)	51	3	0.21	+	14.53	0.00135	0.031
p53-Independent DNA Damage Response (R-MMU-69610)	51	3	0.21	+	14.53	0.00135	0.0306
Ubiquitin Mediated Degradation of Phosphorylated Cdc25A (R-MMU-69601)	51	3	0.21	+	14.53	0.00135	0.0302
Regulation of RUNX3 expression and activity (R-MMU-8941858)	53	3	0.21	+	13.98	0.0015	0.031
Degradation of AXIN (R-MMU-4641257)	54	3	0.22	+	13.73	0.00158	0.0322
FBXL7 down-regulates AURKA during mitotic entry and in early mitosis (R-MMU-8854050)	54	3	0.22	+	13.73	0.00158	0.0318
Degradation of GLI1 by the proteasome (R-MMU-5610780)	55	3	0.22	+	13.48	0.00166	0.0331
Stabilization of p53 (R-MMU-69541)	55	3	0.22	+	13.48	0.00166	0.0327
Golgi Associated Vesicle Biogenesis (R-MMU-432722)	55	3	0.22	+	13.48	0.00166	0.0323
GLI3 is processed to GLI3R by the proteasome (R-MMU-5610785)	56	3	0.23	+	13.24	0.00175	0.0332
Degradation of DVL (R-MMU-4641258)	56	3	0.23	+	13.24	0.00175	0.0328
NIK-->noncanonical NF-kB signaling (R-MMU-5676590)	57	3	0.23	+	13	0.00184	0.034
Dectin-1 mediated noncanonical NF-kB signaling (R-MMU-5607761)	57	3	0.23	+	13	0.00184	0.0336
COPI-mediated anterograde transport (R-MMU-6807878)	96	5	0.39	+	12.87	5.55e-05	0.00295
Metabolism of polyamines (R-MMU-351202)	58	3	0.23	+	12.78	0.00193	0.0345
CDT1 association with the CDC6:ORC:origin complex (R-MMU-68827)	58	3	0.23	+	12.78	0.00193	0.0341
SCF(Skp2)-mediated degradation of p27/p21 (R-MMU-187577)	60	3	0.24	+	12.35	0.00211	0.0355
Transcriptional regulation by RUNX2 (R-MMU-8878166)	61	3	0.25	+	12.15	0.00221	0.0368
Asymmetric localization of PCP proteins (R-MMU-4608870)	61	3	0.25	+	12.15	0.00221	0.0364
Autodegradation of Cdh1 by Cdh1:APC/C (R-MMU-174084)	62	3	0.25	+	11.95	0.00231	0.0377
Hedgehog ligand biogenesis (R-MMU-5358346)	62	3	0.25	+	11.95	0.00231	0.0373
Hedgehog 'off' state (R-MMU-5610787)	106	5	0.43	+	11.65	8.7e-05	0.00449
p53-Dependent G1/S DNA damage checkpoint (R-MMU-69580)	64	3	0.26	+	11.58	0.00252	0.0395
p53-Dependent G1 DNA Damage Response (R-MMU-69563)	64	3	0.26	+	11.58	0.00252	0.0392
Activation of NF-kappaB in B cells (R-MMU-1169091)	64	3	0.26	+	11.58	0.00252	0.0388
Peroxisomal protein import (R-MMU-9033241)	65	3	0.26	+	11.4	0.00263	0.0401
CLEC7A (Dectin-1) signaling (R-MMU-5607764)	87	4	0.35	+	11.36	0.000505	0.0173
APC/C:Cdc20 mediated degradation of Securin (R-MMU-174154)	66	3	0.27	+	11.23	0.00274	0.041
G1/S DNA Damage Checkpoints (R-MMU-69615)	66	3	0.27	+	11.23	0.00274	0.0407
RUNX1 regulates transcription of genes involved in differentiation of HSCs (R-MMU-8939236)	66	3	0.27	+	11.23	0.00274	0.0403
Assembly of the pre-replicative complex (R-MMU-68867)	67	3	0.27	+	11.06	0.00285	0.0416
Regulation of PTEN stability and activity (R-MMU-8948751)	68	3	0.28	+	10.9	0.00297	0.0426
Regulation of RAS by GAPs (R-MMU-5658442)	68	3	0.28	+	10.9	0.00297	0.0422
Cyclin E associated events during G1/S transition (R-MMU-69202)	70	3	0.28	+	10.59	0.00321	0.0453
Orc1 removal from chromatin (R-MMU-68949)	70	3	0.28	+	10.59	0.00321	0.0449
Metabolism of RNA (R-MMU-8953854)	564	24	2.28	+	10.51	6.55e-18	1.54e-15
trans-Golgi Network Vesicle Budding (R-MMU-199992)	71	3	0.29	+	10.44	0.00334	0.0459
CDK-mediated phosphorylation and removal of Cdc6 (R-MMU-69017)	71	3	0.29	+	10.44	0.00334	0.0455
Cdc20:Phospho-APC/C mediated degradation of Cyclin A (R-MMU-174184)	71	3	0.29	+	10.44	0.00334	0.0451
APC/C:Cdh1 mediated degradation of Cdc20 and other APC/C:Cdh1 targeted proteins in late mitosis/early G1 (R-MMU-174178)	71	3	0.29	+	10.44	0.00334	0.0448
Downstream TCR signaling (R-MMU-202424)	95	4	0.38	+	10.4	0.000694	0.022
Factors involved in megakaryocyte development and platelet production (R-MMU-983231)	119	5	0.48	+	10.38	0.000147	0.00692
APC:Cdc20 mediated degradation of cell cycle proteins prior to satisfation of the cell cycle checkpoint (R-MMU-179419)	72	3	0.29	+	10.29	0.00347	0.0461
Cyclin A:Cdk2-associated events at S phase entry (R-MMU-69656)	72	3	0.29	+	10.29	0.00347	0.0458
MAPK6/MAPK4 signaling (R-MMU-5687128)	73	3	0.3	+	10.15	0.0036	0.0467
The role of GTSE1 in G2/M progression after G2 checkpoint (R-MMU-8852276)	73	3	0.3	+	10.15	0.0036	0.0464
ER to Golgi Anterograde Transport (R-MMU-199977)	148	6	0.6	+	10.02	3.77e-05	0.00207
APC/C:Cdc20 mediated degradation of mitotic proteins (R-MMU-176409)	74	3	0.3	+	10.02	0.00374	0.047
Activation of APC/C and APC/C:Cdc20 mediated degradation of mitotic proteins (R-MMU-176814)	75	3	0.3	+	9.88	0.00387	0.0484
Downstream signaling events of B Cell Receptor (BCR) (R-MMU-1168372)	76	3	0.31	+	9.75	0.00402	0.0498
Apoptosis (R-MMU-109581)	104	4	0.42	+	9.5	0.000961	0.0283
Golgi-to-ER retrograde transport (R-MMU-8856688)	130	5	0.53	+	9.5	0.000218	0.00947
C-type lectin receptors (CLRs) (R-MMU-5621481)	107	4	0.43	+	9.24	0.00106	0.0292
Signaling by Hedgehog (R-MMU-5358351)	138	5	0.56	+	8.95	0.000285	0.0121
Programmed Cell Death (R-MMU-5357801)	111	4	0.45	+	8.9	0.00121	0.0313
Clathrin-mediated endocytosis (R-MMU-8856828)	142	5	0.57	+	8.7	0.000324	0.0124
TCR signaling (R-MMU-202403)	114	4	0.46	+	8.67	0.00133	0.0314
G2/M Checkpoints (R-MMU-69481)	146	5	0.59	+	8.46	0.000366	0.0131
FCERI mediated NF-kB activation (R-MMU-2871837)	117	4	0.47	+	8.45	0.00146	0.0306
Transport to the Golgi and subsequent modification (R-MMU-948021)	178	6	0.72	+	8.33	0.000101	0.00491
Ub-specific processing proteases (R-MMU-5689880)	182	5	0.74	+	6.79	0.000965	0.0279
G2/M Transition (R-MMU-69275)	182	5	0.74	+	6.79	0.000965	0.0274
Mitotic G2-G2/M phases (R-MMU-453274)	184	5	0.74	+	6.71	0.00101	0.0283
Intra-Golgi and retrograde Golgi-to-ER traffic (R-MMU-6811442)	188	5	0.76	+	6.57	0.00111	0.0296
RAF/MAP kinase cascade (R-MMU-5673001)	239	6	0.97	+	6.2	0.000473	0.0166
MAPK1/MAPK3 signaling (R-MMU-5684996)	245	6	0.99	+	6.05	0.000538	0.0181
FLT3 Signaling (R-MMU-9607240)	254	6	1.03	+	5.84	0.000647	0.0209
Membrane Trafficking (R-MMU-199991)	562	13	2.27	+	5.71	5.1e-07	3.5e-05
Asparagine N-linked glycosylation (R-MMU-446203)	264	6	1.07	+	5.61	0.000787	0.0245
Metabolism of proteins (R-MMU-392499)	1639	37	6.63	+	5.58	7.71e-19	2.54e-16
Cell Cycle Checkpoints (R-MMU-69620)	266	6	1.08	+	5.57	0.000818	0.025
MAPK family signaling cascades (R-MMU-5683057)	269	6	1.09	+	5.51	0.000866	0.026
Neddylation (R-MMU-8951664)	225	5	0.91	+	5.49	0.0024	0.038
Neutrophil degranulation (R-MMU-6798695)	547	12	2.21	+	5.42	2.49e-06	0.000152
Vesicle-mediated transport (R-MMU-5653656)	638	13	2.58	+	5.03	2.03e-06	0.000129
Antigen processing: Ubiquitination & Proteasome degradation (R-MMU-983168)	297	6	1.2	+	4.99	0.00142	0.0301
Deubiquitination (R-MMU-5688426)	250	5	1.01	+	4.94	0.00373	0.0473
Cellular responses to stress (R-MMU-2262752)	410	8	1.66	+	4.82	0.000286	0.0118
Cellular responses to external stimuli (R-MMU-8953897)	412	8	1.67	+	4.8	0.000296	0.0119
Innate Immune System (R-MMU-168249)	1013	18	4.1	+	4.39	1.26e-07	9.9e-06
M Phase (R-MMU-68886)	353	6	1.43	+	4.2	0.00332	0.046
Class I MHC mediated antigen processing & presentation (R-MMU-983169)	361	6	1.46	+	4.11	0.0037	0.0473
Post-translational protein modification (R-MMU-597592)	1279	20	5.18	+	3.86	1.72e-07	1.29e-05
Cell Cycle (R-MMU-1640170)	550	8	2.23	+	3.59	0.00186	0.0337
Transport of small molecules (R-MMU-382551)	673	9	2.72	+	3.3	0.00171	0.0328
Adaptive Immune System (R-MMU-1280218)	760	10	3.08	+	3.25	0.00106	0.0288
Immune System (R-MMU-168256)	1830	24	7.41	+	3.24	1.97e-07	1.41e-05
Unclassified (UNCLASSIFIED)	12761	19	51.65	-	0.37	2.57e-12	2.65e-10

## Sheet: Rattus norvegic pathway
Analysis Type:	PANTHER Overrepresentation Test (Released 20210224)
Annotation Version and Release Date:	Reactome version 65 Released 2020-11-17
Analyzed List:	upload_1 (Rattus norvegicus)
Reference List:	Rattus norvegicus (all genes in database)
Test Type:	FISHER
Correction:	FDR
Reactome pathways	Rattus norvegicus - REFLIST (21586)	upload_1 (86)	upload_1 (expected)	upload_1 (over/under)	upload_1 (fold Enrichment)	upload_1 (raw P-value)	upload_1 (FDR)
CREB1 phosphorylation through the activation of Adenylate Cyclase (R-RNO-442720)	5	2	0.02	+	> 100	0.000323	0.012
PKA activation in glucagon signalling (R-RNO-164378)	5	2	0.02	+	> 100	0.000323	0.0118
Glucagon signaling in metabolic regulation (R-RNO-163359)	7	2	0.03	+	71.71	0.00055	0.0174
Regulation of localization of FOXO transcription factors (R-RNO-9614399)	12	2	0.05	+	41.83	0.00137	0.0293
Activation of BAD and translocation to mitochondria (R-RNO-111447)	12	2	0.05	+	41.83	0.00137	0.0289
Chk1/Chk2(Cds1) mediated inactivation of Cyclin B:Cdk1 complex (R-RNO-75035)	12	2	0.05	+	41.83	0.00137	0.0285
Formation of the ternary complex, and subsequently, the 43S complex (R-RNO-72695)	51	8	0.2	+	39.37	8.29e-11	7.16e-09
Translation initiation complex formation (R-RNO-72649)	58	9	0.23	+	38.95	5.63e-12	5.78e-10
Activation of the mRNA upon binding of the cap-binding complex and eIFs, and subsequent binding to 43S (R-RNO-72662)	59	9	0.24	+	38.29	6.46e-12	6.24e-10
Pentose phosphate pathway (R-RNO-71336)	14	2	0.06	+	35.86	0.0018	0.0336
Ribosomal scanning and start codon recognition (R-RNO-72702)	58	8	0.23	+	34.62	2.1e-10	1.72e-08
Formation of a pool of free 40S subunits (R-RNO-72689)	112	15	0.45	+	33.62	2.16e-18	7.11e-16
DARPP-32 events (R-RNO-180024)	15	2	0.06	+	33.47	0.00204	0.0348
PKA activation (R-RNO-163615)	15	2	0.06	+	33.47	0.00204	0.0345
PKA-mediated phosphorylation of CREB (R-RNO-111931)	15	2	0.06	+	33.47	0.00204	0.0341
Nonsense Mediated Decay (NMD) independent of the Exon Junction Complex (EJC) (R-RNO-975956)	106	14	0.42	+	33.15	3.79e-17	8.9e-15
L13a-mediated translational silencing of Ceruloplasmin expression (R-RNO-156827)	122	16	0.49	+	32.92	1.98e-19	1.63e-16
SRP-dependent cotranslational protein targeting to membrane (R-RNO-1799339)	104	13	0.41	+	31.38	1.04e-15	1.43e-13
Post NMDA receptor activation events (R-RNO-438064)	16	2	0.06	+	31.38	0.00229	0.0364
Cap-dependent Translation Initiation (R-RNO-72737)	130	16	0.52	+	30.89	5.01e-19	2.74e-16
Eukaryotic Translation Initiation (R-RNO-72613)	130	16	0.52	+	30.89	5.01e-19	2.06e-16
GTP hydrolysis and joining of the 60S ribosomal subunit (R-RNO-72706)	123	15	0.49	+	30.61	7.81e-18	2.14e-15
Tristetraprolin (TTP, ZFP36) binds and destabilizes mRNA (R-RNO-450513)	17	2	0.07	+	29.53	0.00255	0.0373
Nonsense Mediated Decay (NMD) enhanced by the Exon Junction Complex (EJC) (R-RNO-975957)	125	14	0.5	+	28.11	3.13e-16	5.71e-14
Nonsense-Mediated Decay (NMD) (R-RNO-927802)	125	14	0.5	+	28.11	3.13e-16	5.14e-14
Activation of BH3-only proteins (R-RNO-114452)	18	2	0.07	+	27.89	0.00282	0.04
Synthesis of active ubiquitin: roles of E1 and E2 enzymes (R-RNO-8866652)	29	3	0.12	+	25.97	0.000275	0.0108
FOXO-mediated transcription (R-RNO-9614085)	20	2	0.08	+	25.1	0.00341	0.0438
Downregulation of SMAD2/3:SMAD4 transcriptional activity (R-RNO-2173795)	20	2	0.08	+	25.1	0.00341	0.0435
Oxygen-dependent proline hydroxylation of Hypoxia-inducible Factor Alpha (R-RNO-1234176)	62	5	0.25	+	20.24	6.96e-06	0.00044
Cellular response to hypoxia (R-RNO-1234174)	66	5	0.26	+	19.02	9.27e-06	0.000564
AUF1 (hnRNP D0) binds and destabilizes mRNA (R-RNO-450408)	54	4	0.22	+	18.59	8.33e-05	0.00402
Regulation of mRNA stability by proteins that bind AU-rich elements (R-RNO-450531)	83	6	0.33	+	18.14	1.46e-06	9.59e-05
Translation (R-RNO-72766)	236	17	0.94	+	18.08	1.57e-16	3.23e-14
rRNA processing in the nucleus and cytosol (R-RNO-8868773)	189	13	0.75	+	17.26	1.3e-12	1.65e-10
rRNA processing (R-RNO-72312)	189	13	0.75	+	17.26	1.3e-12	1.53e-10
Major pathway of rRNA processing in the nucleolus and cytosol (R-RNO-6791226)	189	13	0.75	+	17.26	1.3e-12	1.43e-10
RAB geranylgeranylation (R-RNO-8873719)	59	4	0.24	+	17.02	0.000115	0.0054
Protein ubiquitination (R-RNO-8852135)	61	4	0.24	+	16.46	0.00013	0.00577
TP53 Regulates Metabolic Genes (R-RNO-5628897)	47	3	0.19	+	16.02	0.00103	0.0278
Cross-presentation of soluble exogenous antigens (endosomes) (R-RNO-1236978)	48	3	0.19	+	15.69	0.00109	0.0277
Ubiquitin-dependent degradation of Cyclin D (R-RNO-75815)	49	3	0.2	+	15.37	0.00116	0.0288
COPI-independent Golgi-to-ER retrograde traffic (R-RNO-6811436)	49	3	0.2	+	15.37	0.00116	0.0284
Regulation of RUNX2 expression and activity (R-RNO-8939902)	49	3	0.2	+	15.37	0.00116	0.028
Regulation of ornithine decarboxylase (ODC) (R-RNO-350562)	50	3	0.2	+	15.06	0.00122	0.0291
p53-Independent G1/S DNA damage checkpoint (R-RNO-69613)	50	3	0.2	+	15.06	0.00122	0.0287
p53-Independent DNA Damage Response (R-RNO-69610)	50	3	0.2	+	15.06	0.00122	0.0283
Ubiquitin Mediated Degradation of Phosphorylated Cdc25A (R-RNO-69601)	50	3	0.2	+	15.06	0.00122	0.0279
Autodegradation of the E3 ubiquitin ligase COP1 (R-RNO-349425)	50	3	0.2	+	15.06	0.00122	0.0275
Regulation of RUNX3 expression and activity (R-RNO-8941858)	51	3	0.2	+	14.76	0.00129	0.0283
Degradation of AXIN (R-RNO-4641257)	52	3	0.21	+	14.48	0.00136	0.0295
FBXL7 down-regulates AURKA during mitotic entry and in early mitosis (R-RNO-8854050)	53	3	0.21	+	14.21	0.00144	0.0295
Degradation of GLI1 by the proteasome (R-RNO-5610780)	54	3	0.22	+	13.94	0.00151	0.0307
Stabilization of p53 (R-RNO-69541)	54	3	0.22	+	13.94	0.00151	0.0303
Degradation of DVL (R-RNO-4641258)	55	3	0.22	+	13.69	0.00159	0.0315
GLI3 is processed to GLI3R by the proteasome (R-RNO-5610785)	55	3	0.22	+	13.69	0.00159	0.0311
Dectin-1 mediated noncanonical NF-kB signaling (R-RNO-5607761)	56	3	0.22	+	13.45	0.00167	0.0323
NIK-->noncanonical NF-kB signaling (R-RNO-5676590)	56	3	0.22	+	13.45	0.00167	0.0319
CDT1 association with the CDC6:ORC:origin complex (R-RNO-68827)	57	3	0.23	+	13.21	0.00175	0.0331
COPI-mediated anterograde transport (R-RNO-6807878)	96	5	0.38	+	13.07	5.14e-05	0.00281
Metabolism of polyamines (R-RNO-351202)	58	3	0.23	+	12.98	0.00184	0.0339
Activation of NF-kappaB in B cells (R-RNO-1169091)	59	3	0.24	+	12.76	0.00193	0.0348
SCF(Skp2)-mediated degradation of p27/p21 (R-RNO-187577)	59	3	0.24	+	12.76	0.00193	0.0344
Asymmetric localization of PCP proteins (R-RNO-4608870)	60	3	0.24	+	12.55	0.00202	0.0356
Hedgehog ligand biogenesis (R-RNO-5358346)	60	3	0.24	+	12.55	0.00202	0.0352
Transcriptional regulation by RUNX2 (R-RNO-8878166)	60	3	0.24	+	12.55	0.00202	0.0349
Autodegradation of Cdh1 by Cdh1:APC/C (R-RNO-174084)	61	3	0.24	+	12.34	0.00211	0.0347
Hedgehog 'off' state (R-RNO-5610787)	105	5	0.42	+	11.95	7.72e-05	0.00396
p53-Dependent G1/S DNA damage checkpoint (R-RNO-69580)	63	3	0.25	+	11.95	0.00231	0.0364
p53-Dependent G1 DNA Damage Response (R-RNO-69563)	63	3	0.25	+	11.95	0.00231	0.036
CLEC7A (Dectin-1) signaling (R-RNO-5607764)	85	4	0.34	+	11.81	0.000436	0.0149
Peroxisomal protein import (R-RNO-9033241)	64	3	0.25	+	11.77	0.00241	0.0369
Assembly of the pre-replicative complex (R-RNO-68867)	64	3	0.25	+	11.77	0.00241	0.0366
RUNX1 regulates transcription of genes involved in differentiation of HSCs (R-RNO-8939236)	65	3	0.26	+	11.58	0.00251	0.0378
G1/S DNA Damage Checkpoints (R-RNO-69615)	65	3	0.26	+	11.58	0.00251	0.0375
APC/C:Cdc20 mediated degradation of Securin (R-RNO-174154)	65	3	0.26	+	11.58	0.00251	0.0371
Regulation of RAS by GAPs (R-RNO-5658442)	66	3	0.26	+	11.41	0.00262	0.038
Downstream TCR signaling (R-RNO-202424)	89	4	0.35	+	11.28	0.000516	0.0169
Regulation of PTEN stability and activity (R-RNO-8948751)	67	3	0.27	+	11.24	0.00273	0.0389
Orc1 removal from chromatin (R-RNO-68949)	68	3	0.27	+	11.07	0.00284	0.0398
Cyclin E associated events during G1/S transition (R-RNO-69202)	68	3	0.27	+	11.07	0.00284	0.0395
Factors involved in megakaryocyte development and platelet production (R-RNO-983231)	115	5	0.46	+	10.91	0.000117	0.00532
MAPK6/MAPK4 signaling (R-RNO-5687128)	70	3	0.28	+	10.76	0.00307	0.042
CDK-mediated phosphorylation and removal of Cdc6 (R-RNO-69017)	70	3	0.28	+	10.76	0.00307	0.0417
Cyclin A:Cdk2-associated events at S phase entry (R-RNO-69656)	70	3	0.28	+	10.76	0.00307	0.0413
Cdc20:Phospho-APC/C mediated degradation of Cyclin A (R-RNO-174184)	70	3	0.28	+	10.76	0.00307	0.041
APC/C:Cdh1 mediated degradation of Cdc20 and other APC/C:Cdh1 targeted proteins in late mitosis/early G1 (R-RNO-174178)	70	3	0.28	+	10.76	0.00307	0.0407
APC:Cdc20 mediated degradation of cell cycle proteins prior to satisfation of the cell cycle checkpoint (R-RNO-179419)	71	3	0.28	+	10.61	0.00319	0.0419
Downstream signaling events of B Cell Receptor (BCR) (R-RNO-1168372)	71	3	0.28	+	10.61	0.00319	0.0416
The role of GTSE1 in G2/M progression after G2 checkpoint (R-RNO-8852276)	72	3	0.29	+	10.46	0.00332	0.0429
ER to Golgi Anterograde Transport (R-RNO-199977)	146	6	0.58	+	10.32	3.19e-05	0.00181
APC/C:Cdc20 mediated degradation of mitotic proteins (R-RNO-176409)	73	3	0.29	+	10.32	0.00344	0.0435
UCH proteinases (R-RNO-5689603)	74	3	0.29	+	10.18	0.00357	0.0448
Activation of APC/C and APC/C:Cdc20 mediated degradation of mitotic proteins (R-RNO-176814)	74	3	0.29	+	10.18	0.00357	0.0444
Transcriptional regulation by RUNX3 (R-RNO-8878159)	74	3	0.29	+	10.18	0.00357	0.0441
Degradation of beta-catenin by the destruction complex (R-RNO-195253)	76	3	0.3	+	9.91	0.00384	0.047
Golgi-to-ER retrograde transport (R-RNO-8856688)	127	5	0.51	+	9.88	0.000182	0.00748
Apoptosis (R-RNO-109581)	102	4	0.41	+	9.84	0.000844	0.0239
Metabolism of RNA (R-RNO-8953854)	563	22	2.24	+	9.81	7.06e-16	1.05e-13
Antigen processing-Cross presentation (R-RNO-1236975)	78	3	0.31	+	9.65	0.00412	0.0494
C-type lectin receptors (CLRs) (R-RNO-5621481)	104	4	0.41	+	9.65	0.000905	0.0252
TCR signaling (R-RNO-202403)	108	4	0.43	+	9.3	0.00104	0.0274
Programmed Cell Death (R-RNO-5357801)	108	4	0.43	+	9.3	0.00104	0.027
Signaling by Hedgehog (R-RNO-5358351)	136	5	0.54	+	9.23	0.000248	0.00992
G2/M Checkpoints (R-RNO-69481)	143	5	0.57	+	8.78	0.00031	0.0118
Transport to the Golgi and subsequent modification (R-RNO-948021)	174	6	0.69	+	8.66	8.19e-05	0.00408
Ub-specific processing proteases (R-RNO-5689880)	158	5	0.63	+	7.94	0.000482	0.0162
FCERI mediated NF-kB activation (R-RNO-2871837)	131	4	0.52	+	7.66	0.00206	0.0342
Clathrin-mediated endocytosis (R-RNO-8856828)	141	4	0.56	+	7.12	0.00267	0.0385
G2/M Transition (R-RNO-69275)	177	5	0.71	+	7.09	0.000795	0.0233
Mitotic G2-G2/M phases (R-RNO-453274)	178	5	0.71	+	7.05	0.000814	0.0235
Intra-Golgi and retrograde Golgi-to-ER traffic (R-RNO-6811442)	186	5	0.74	+	6.75	0.000986	0.027
RAF/MAP kinase cascade (R-RNO-5673001)	233	6	0.93	+	6.46	0.000381	0.0136
MAPK1/MAPK3 signaling (R-RNO-5684996)	239	6	0.95	+	6.3	0.000434	0.0152
Neutrophil degranulation (R-RNO-6798695)	489	12	1.95	+	6.16	6.62e-07	4.53e-05
FLT3 Signaling (R-RNO-9607240)	248	6	0.99	+	6.07	0.000525	0.0169
Asparagine N-linked glycosylation (R-RNO-446203)	257	6	1.02	+	5.86	0.00063	0.0195
Metabolism of proteins (R-RNO-392499)	1603	37	6.39	+	5.79	1.68e-19	2.76e-16
Cell Cycle Checkpoints (R-RNO-69620)	260	6	1.04	+	5.79	0.000669	0.0203
Neddylation (R-RNO-8951664)	217	5	0.86	+	5.78	0.00192	0.035
MAPK family signaling cascades (R-RNO-5683057)	261	6	1.04	+	5.77	0.000682	0.0204
Deubiquitination (R-RNO-5688426)	225	5	0.9	+	5.58	0.00223	0.0363
Antigen processing: Ubiquitination & Proteasome degradation (R-RNO-983168)	286	6	1.14	+	5.27	0.00108	0.0278
Cellular responses to stress (R-RNO-2262752)	385	8	1.53	+	5.22	0.000168	0.00728
Cellular responses to external stimuli (R-RNO-8953897)	387	8	1.54	+	5.19	0.000174	0.00734
Membrane Trafficking (R-RNO-199991)	553	11	2.2	+	4.99	1.41e-05	0.000826
Intracellular signaling by second messengers (R-RNO-9006925)	257	5	1.02	+	4.88	0.00391	0.0472
Innate Immune System (R-RNO-168249)	938	17	3.74	+	4.55	1.75e-07	1.31e-05
Class I MHC mediated antigen processing & presentation (R-RNO-983169)	332	6	1.32	+	4.54	0.00227	0.0366
M Phase (R-RNO-68886)	333	6	1.33	+	4.52	0.00231	0.0357
Vesicle-mediated transport (R-RNO-5653656)	642	11	2.56	+	4.3	5.38e-05	0.00285
Post-translational protein modification (R-RNO-597592)	1218	20	4.85	+	4.12	5.79e-08	4.53e-06
Cell Cycle (R-RNO-1640170)	525	8	2.09	+	3.82	0.00126	0.0279
Immune System (R-RNO-168256)	1739	23	6.93	+	3.32	2.33e-07	1.66e-05
Adaptive Immune System (R-RNO-1280218)	745	9	2.97	+	3.03	0.003	0.0414
Metabolism (R-RNO-1430728)	1713	15	6.82	+	2.2	0.00389	0.0473
Unclassified (UNCLASSIFIED)	12810	20	51.04	-	0.39	1.31e-11	1.2e-09
