# Supplementary figures and images for: Salivary Exosome Proteomics and Bioinformatics Analysis in 7,12-Dimethylbenz[a]anthracene-Induced Oral Cancer with Radiation Therapy—A Syrian Golden Hamster Model
Source: MDPI journal article supplement (doi:10.3390/diagnostics12010065), 2021-12-28

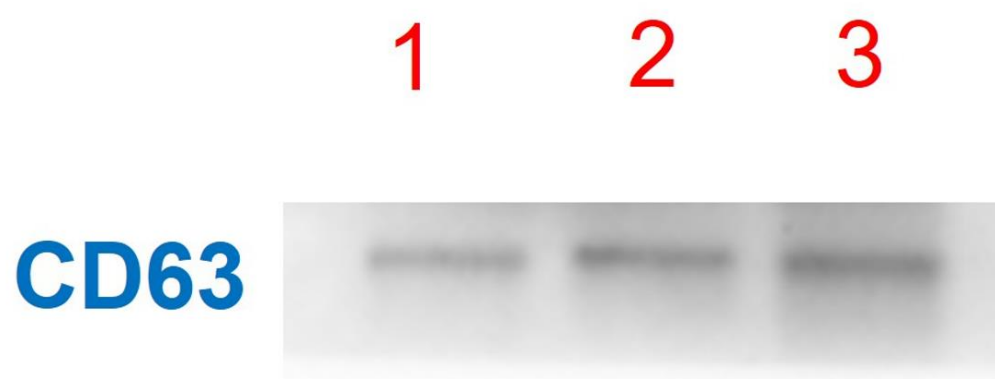

**Figure S1.** Detection of CD63 expression of salivary exosome proteins from 3 mice among PreD group.

Supplement: s1 [file s1]
